# Supplementary material for: Analysis of the Prognostic Significance and Immune Infiltration of the Amino Acid Metabolism-Related Genes in Colon Adenocarcinoma
Source: Front Genet. 2022 Aug 10;13:951461. doi: 10.3389/fgene.2022.951461 (PMC9399353; doi:10.3389/fgene.2022.951461)
Supplement: Supplementary file 2 [file Table4.xls]

## Sheet: Table S4_KEGG
KEGG analysis between two risk groups
	ID	Description	GeneRatio	BgRatio	pvalue	p.adjust	qvalue	geneID	Count
hsa05168	hsa05168	Herpes simplex virus 1 infection	244/3186	495/8135	1.51633e-06	0.000506453	0.000400629	637/5499/163255/7587/8772/284370/7710/5290/100529215/10000/1978/3135/162993/7581/84911/5451/22869/7188/7248/117608/10189/6432/90338/55900/8891/51710/158431/163081/285268/284390/199704/84874/7644/90321/100289635/7637/7132/339327/163223/7767/63934/8764/57786/388536/170959/162963/30832/57677/51276/84765/578/3654/7556/349075/148266/90075/718/7757/3111/8683/57547/7638/84449/7768/80264/126231/7639/5720…	244
hsa04510	hsa04510	Focal adhesion	110/3186	201/8135	4.43344e-06	0.000740385	0.000585681	2321/5499/4660/7148/5063/8515/1311/4638/3915/5290/10000/387/1285/7060/6654/5649/56034/3910/2335/7058/673/1280/394/3479/60/2534/3679/7059/3912/7094/1299/1793/22801/5595/6655/1282/399694/3685/7424/80310/10319/3688/3791/4659/1286/896/1284/256076/7143/5062/2932/10398/208/71/5159/2324/1293/3918/9475/3265/6093/3674/595/1278/7422/3678/7057/858/340156/3611/3696/5295/3371/5501/3672/5908/5602/7414/7791/206…	110
hsa04020	hsa04020	Calcium signaling pathway	124/3186	240/8135	4.53483e-05	0.00355431	0.00281164	3706/3357/292/2321/5021/4638/1816/5350/4915/4916/775/2246/6869/4842/493/3708/779/6546/6865/5153/56034/4843/2260/6262/84812/84876/2250/845/57118/1129/7419/4803/3709/2767/6263/7424/80310/2252/3791/5979/4923/5733/5731/3356/8817/5025/90550/55283/2925/5136/1909/2776/2903/185/887/293/5159/2324/808/623/2248/5027/108/3707/2254/492/3270/56413/7422/5568/624/340156/2774/51806/6261/136/153/844/154/5024/2911/…	124
hsa04512	hsa04512	ECM-receptor interaction	53/3186	88/8135	4.76772e-05	0.00355431	0.00281164	7148/8515/1311/3915/1285/7060/5649/3910/2335/7058/1280/22987/3679/7059/9899/3912/1299/22801/1282/3685/10319/3688/1286/1284/256076/7143/2811/1293/341640/3918/9900/3674/3339/1278/3678/7057/3696/2815/3371/3672/3909/1277/3913/3694/3911/961/3690/1101/158326/63923/948/284217/22798	53
hsa04270	hsa04270	Vascular smooth muscle contraction	75/3186	134/8135	5.32082e-05	0.00355431	0.00281164	797/4629/5499/4660/4628/4638/27094/800/387/775/5320/3708/779/4637/5605/23365/5322/3779/673/59/111/5592/3709/5595/2767/64600/369/4882/10242/4659/8399/1909/2776/10398/185/1908/10203/3778/808/108/9475/6093/8681/5568/183/72/340156/51806/136/5501/100137049/8605/9138/2977/23236/5588/1906/4881/147/114/5321/796/148/5583/1907/4627/552/107/9826/26279/5581/5331/5567/5579/805	75
hsa04530	hsa04530	Tight junction	90/3186	169/8135	0.00012316	0.0065638	0.00519229	1740/5010/4629/10552/1366/4628/8777/84790/92359/84952/137075/387/9368/1365/9073/50855/11149/4637/154810/5111/79861/5872/5962/83700/10376/60/1019/9223/9181/3688/7074/7277/10093/10095/5518/79778/1364/861/10398/71/6794/24146/912/9693/58494/5590/9475/6093/595/5521/653857/3993/5568/1739/5571/10097/51421/4771/3996/51422/51735/57180/4214/5602/49861/5516/2064/7082/4301/81873/7430/4478/55844/5520/87/4627/…	90
hsa04974	hsa04974	Protein digestion and absorption	59/3186	103/8135	0.000137565	0.0065638	0.00519229	340024/169044/84570/7373/1296/482/477/1295/1285/1301/4225/6546/1280/1358/483/1299/1282/1290/57642/1359/5644/1300/1307/2006/1286/1284/256076/5646/23436/81578/1289/1281/1306/1293/1360/478/136227/85301/1303/1278/1305/153201/91522/54407/255631/1302/1277/206358/5645/1310/6550/6505/117247/6547/3784/120103/4311/80781/486	59
hsa04014	hsa04014	Ras signaling pathway	117/3186	232/8135	0.000269105	0.0101289	0.00801248	2321/5063/2783/5290/4915/10000/387/1943/5320/2246/4804/4763/5921/6654/27/51365/56034/10156/5605/2260/5322/2250/3479/4803/51378/5595/6655/11186/399694/2323/100271927/7424/2787/64600/80310/2252/7074/3791/5922/8817/2113/8399/25780/5062/55770/2903/9462/5966/2782/2790/208/5159/2324/808/2248/59345/22808/8831/5868/3265/2254/285/5869/7422/8681/5568/5295/284/51806/9846/5908/100137049/8605/5602/9965/5781/6…	117
hsa05012	hsa05012	Parkinson disease	132/3186	266/8135	0.000276223	0.0101289	0.00801248	292/118424/1537/9377/5690/5709/347733/5714/5691/3800/25828/5688/5686/10131/84790/4728/5689/4706/7384/1351/29985/29796/27089/6390/3708/4713/4716/7311/10383/147700/4696/5692/6622/4722/54539/1347/4726/5708/440567/5702/79861/5693/5719/1327/7385/10376/7419/4723/10975/1349/7345/111/374291/1329/23516/3709/5704/4700/5694/6263/2770/51079/7386/7277/6647/4704/90550/120892/11047/5701/581/293/4695/808/11315/1…	132
hsa05218	hsa05218	Melanoma	43/3186	72/8135	0.000314663	0.0101289	0.00801248	5290/10000/2246/1869/4286/56034/5605/2260/673/2250/3479/1019/578/5595/51426/80310/2252/369/1870/8817/581/208/5159/2248/1871/3265/2254/595/10912/5295/9965/2255/572/207/8822/4616/1021/2247/5155/5728/3480/4233/2249	43
hsa04340	hsa04340	Hedgehog signaling pathway	35/3186	56/8135	0.000333587	0.0101289	0.00801248	50937/408/132884/91653/374654/2121/57758/11127/4036/2737/23432/2619/2932/8454/5727/23291/64750/84976/595/1954/5568/1455/2735/8643/156/409/122011/55733/23295/2736/8945/57154/8405/5567/84455	35
hsa04810	hsa04810	Regulation of actin cytoskeleton	110/3186	218/8135	0.000395004	0.0109943	0.00869702	4629/5499/10552/4660/4628/5063/8515/200576/4638/5290/387/2246/6654/5216/56034/5605/2335/23365/2260/673/2250/1072/5962/1129/60/3679/10152/1793/22801/5595/6655/6387/3685/80310/3688/2252/369/7074/324/10093/4659/8817/10095/55740/5062/57121/10398/5305/71/5159/8936/623/2248/22808/3682/9475/2846/3265/6093/1073/2254/3674/3645/653857/3678/624/340156/10097/3696/5295/8826/3681/5501/3672/54434/85464/57180/91…	110
hsa04919	hsa04919	Thyroid hormone signaling pathway	65/3186	121/8135	0.0007598	0.019521	0.0154421	5350/482/477/5290/10000/5605/9862/84812/8648/23389/54361/60/483/5595/3685/4855/5211/10025/1734/2932/208/71/4853/8841/8202/10231/478/3265/595/9969/116931/5568/9442/5295/3065/5469/6513/2033/23236/4854/1387/572/53919/10499/5336/4609/29079/207/2099/652/117247/9440/489/3690/9882/6714/5331/7068/90390/842/5567/5579/486/6548/7067	65
hsa04724	hsa04724	Glutamatergic synapse	61/3186	114/8135	0.00123935	0.0268891	0.0212706	7220/2783/775/2775/3708/2901/2914/111/3709/5595/246213/2787/50944/2770/2776/2903/1742/2782/2790/2744/108/59345/81539/85358/2752/8681/5568/2773/54407/2892/100137049/156/8605/2911/23236/6507/2785/114/5321/57030/2897/2916/22941/773/107/2891/2893/9456/2917/6505/9454/54331/9229/2792/5331/10681/2905/5567/5579/2912/5530	61
hsa04022	hsa04022	cGMP-PKG signaling pathway	85/3186	167/8135	0.00124012	0.0268891	0.0212706	292/5499/4638/5350/482/477/27094/10000/387/775/493/4207/3708/779/6546/4205/5605/3779/4208/7419/111/483/5592/3709/5595/2767/4882/2770/5138/10242/4659/1909/1258/2776/10398/185/5140/293/208/3778/808/108/1386/9475/478/1385/6093/8654/492/2773/624/340156/5593/51806/153/5501/2969/100271849/154/7417/2977/23236/4881/572/147/114/490/148/491/10105/4776/207/107/4985/489/6547/5581/151/5331/1388/4209/3643/486/…	85
hsa04015	hsa04015	Rap1 signaling pathway	104/3186	210/8135	0.0012881	0.0268891	0.0212706	2321/5290/10000/387/1943/2246/4804/2775/50855/5587/5216/56034/5605/2260/673/2250/3479/4803/60/51378/111/9863/7094/5595/9223/7424/80310/3688/2252/7074/3791/2770/9732/3397/8817/25780/55740/57121/2776/2903/889/208/71/5159/2324/808/2248/5603/108/22808/9693/5590/2846/3265/2254/3674/285/7422/7057/2773/1268/5295/284/51806/11069/136/51735/5908/23236/9965/4301/2255/23683/114/207/107/7010/51466/8822/1946/2…	104
hsa04971	hsa04971	Gastric acid secretion	43/3186	76/8135	0.00150391	0.0295475	0.0233735	3773/4638/482/477/760/3708/60/111/483/3709/2770/2776/887/71/808/108/478/54207/5568/2773/3766/340156/51806/3776/115111/23236/7430/1131/9992/114/107/3772/815/3784/5331/6522/389015/3274/5567/5579/3758/6548/805	43
hsa04350	hsa04350	TGF-beta signaling pathway	51/3186	94/8135	0.00203451	0.0377465	0.0298594	6199/7042/659/3625/387/4052/151449/8200/7043/3624/2200/9765/7046/6198/5595/1874/7027/9978/3397/392255/5518/8454/4681/93/64388/658/64750/6093/7057/26585/9241/8646/7048/90/56963/269/657/2033/5516/1387/79875/4838/4609/1634/652/3626/57154/7124/130399/4090/92	51
hsa05224	hsa05224	Breast cancer	75/3186	147/8135	0.00214726	0.0377465	0.0298594	6199/5241/8322/5290/26508/10000/2246/4040/6654/83439/1869/5605/2260/673/2250/3479/8648/54361/1019/578/6198/5595/6655/399694/51426/4855/2252/369/1870/23462/324/8817/2932/581/1855/208/4853/8202/7477/2324/2248/1871/3265/2254/595/10912/388585/5295/51176/2064/9965/6464/2255/4854/11211/122011/8600/4609/23493/207/8822/2099/4616/1021/2247/7471/5728/7481/3480/675/7479/8321/3815/2249/8323	75
hsa05165	hsa05165	Human papillomavirus infection	155/3186	331/8135	0.0022782	0.0380459	0.0300962	533/6199/1740/9114/84441/7148/8515/1311/8322/3915/92359/8772/5290/26508/10000/1978/9368/3135/1285/7060/472/6654/534/7248/5649/50855/83439/1869/3910/5605/2335/7058/57801/1280/7132/54361/3679/1019/578/7059/3912/9296/6198/1299/22801/5595/6655/1282/898/3685/9223/4855/10319/3688/5528/23462/324/5523/1286/896/1284/256076/7143/3516/5518/2932/581/1855/3105/208/4853/5159/7477/890/1293/9794/5590/10312/3918/…	155
hsa04728	hsa04728	Dopaminergic synapse	68/3186	132/8135	0.00247757	0.0381343	0.0301661	5499/3800/1816/2783/408/10000/775/2775/3708/111/3709/2787/5528/2770/1312/5523/5518/2932/2776/2903/2782/2790/208/808/5603/59345/1386/1385/5521/3798/5568/2773/2892/84152/2774/51806/5501/28227/7054/409/5602/5516/23236/2785/6571/55844/3762/5520/773/207/815/2891/2893/1644/220074/54331/6531/4128/2792/5331/10681/1388/3799/5567/5579/5600/5530/805	68
hsa04924	hsa04924	Renin secretion	39/3186	69/8135	0.00251184	0.0381343	0.0301661	22802/775/3708/779/5153/84876/111/3709/117/2770/5136/1909/2776/185/5140/1908/3778/808/1385/116/5568/2773/183/5593/51806/153/154/2977/23236/1179/1906/4881/1907/9635/5331/5567/5732/5530/805	39
hsa04371	hsa04371	Apelin signaling pathway	71/3186	139/8135	0.00267595	0.0388594	0.0307397	5346/6199/4638/2783/10000/4842/4207/3708/6546/4205/4843/5605/6262/59/7046/4208/111/6198/3709/5595/6263/2787/2770/643246/2776/185/5140/2782/2790/30849/208/10365/808/108/59345/22808/4634/8862/3265/595/5568/2773/340156/5571/51806/51422/6261/100271849/23236/4854/2785/114/207/5054/107/814/22800/54331/5565/6547/5581/5289/2792/5331/10681/5563/4209/5567/6237/6548/805	71
hsa05022	hsa05022	Pathways of neurodegeneration - multiple diseases	215/3186	476/8135	0.00346002	0.0477511	0.0377735	637/292/118424/1537/9377/5690/5709/347733/5714/5691/3800/5688/5686/10131/84790/8322/6310/4728/5689/4706/8772/7384/1351/29796/775/27089/2876/8701/4842/6390/4040/3708/4713/779/4716/7311/10383/147700/11258/493869/4843/4696/5692/25981/6622/5605/50507/3028/4722/6262/54539/1347/4726/5708/440567/5702/673/7132/79861/5693/5719/823/1327/7385/10376/7419/4723/54361/10975/1349/7345/374291/1329/4744/578/3709/5…	215
hsa04218	hsa04218	Cellular senescence	78/3186	156/8135	0.00357418	0.0477511	0.0377735	292/7042/5499/3486/4605/10114/5290/10000/1978/3135/9133/3708/472/7248/1869/7043/5605/7046/677/823/7419/891/1019/2309/3709/5595/1874/898/1870/2113/896/90550/3105/293/208/890/808/5603/23291/22808/23411/1871/3265/595/55957/10912/10111/5295/7048/51806/5501/2305/7417/4361/54822/4609/4776/207/28996/5054/3106/11200/3134/4616/8945/59341/22800/1021/5934/5728/983/3107/91750/5600/5530/6237/805/85417	78
hsa03410	hsa03410	Base excision repair	21/3186	33/8135	0.00378879	0.0486714	0.0385015	4350/5425/5111/5424/27301/4913/4595/5427/5423/8930/56655/4968/23583/55247/7374/54107/2237/328/27343/3978/3146	21
hsa04360	hsa04360	Axon guidance	89/3186	182/8135	0.00438614	0.0499981	0.039551	6586/57689/56920/659/9353/5063/7220/5290/90249/387/1943/2042/5921/80031/151449/91653/91584/50855/23365/8829/1072/1949/2045/54361/2534/5595/1020/6387/9901/3688/2770/29984/55740/5062/2932/10398/10371/5727/23380/5590/658/9475/10512/3265/6093/1073/10500/22885/2051/223117/2041/2773/3611/285220/5295/219699/6091/7223/56963/5365/57522/54434/85464/54437/9423/9723/54910/5781/10154/23654/5336/1947/25/4776/5…	89
hsa05205	hsa05205	Proteoglycans in cancer	99/3186	205/8135	0.00444018	0.0499981	0.039551	6199/7042/5499/4660/287/8322/5290/10000/387/84309/3708/6654/867/5605/2335/23365/2260/673/3479/5962/54361/60/6198/3709/5595/6655/3685/3688/369/7074/3791/4659/208/5727/71/7477/5603/22808/4060/7099/9475/3265/6093/7291/595/3339/1278/7422/3678/7057/5568/858/5295/8826/2719/5501/3236/9138/2064/5781/2318/7430/11211/4478/1277/7097/5336/4609/288/2316/6383/1634/207/2066/815/2099/857/22800/2247/27250/7471/33…	99
hsa04723	hsa04723	Retrograde endocannabinoid signaling	74/3186	148/8135	0.00446667	0.0499981	0.039551	4728/4706/2783/775/2775/3708/4713/779/4716/4696/4722/54539/4726/4723/2561/111/374291/3709/5595/4700/246213/2787/2770/51079/4704/2776/2782/2790/4695/5603/108/59345/4708/140679/4720/126328/55967/4725/4698/4717/5568/2773/4710/1268/2892/4707/4715/57406/2911/2166/5602/23236/2785/114/2563/57030/4714/3762/773/107/2570/2891/2893/54331/2792/2569/5331/10681/56901/2558/5567/5579/22999/5600	74
hsa05014	hsa05014	Amyotrophic lateral sclerosis	167/3186	364/8135	0.00449085	0.0499981	0.039551	637/1537/9377/5690/5709/347733/5714/5691/3800/144983/5688/5686/84790/7175/4728/5689/4706/834/7384/6396/1351/3084/29796/27089/2876/8701/4842/6390/4713/4716/9782/10189/6432/10383/147700/5216/11258/493869/4843/4696/5692/25981/4722/54539/1347/4726/5708/440567/5702/23064/7132/79861/5693/400916/5719/1327/7385/10376/4723/60/10975/5903/1349/374291/1329/4744/5704/4700/5694/29107/55706/51079/7386/7133/7277…	167
hsa04932	hsa04932	Non-alcoholic fatty liver disease	77/3186	155/8135	0.00467331	0.0503512	0.0398303	3952/637/1537/9377/9370/4728/4706/7384/6945/5290/1351/10000/29796/27089/6390/4713/4716/4696/4722/1050/54539/1347/4726/440567/7132/1327/7385/4723/10975/1349/374291/1329/4700/3953/51079/7386/4704/2932/581/4695/208/5603/1571/1337/4296/1340/4708/4720/126328/55967/4725/9167/4698/4717/4710/7381/5571/4707/5295/4715/51422/2081/5602/4714/207/10062/1965/9451/7124/5565/6389/1649/5563/3643/56901/5313/5600	77
hsa05020	hsa05020	Prion disease	128/3186	273/8135	0.00499363	0.051908	0.0410618	292/1537/9377/5690/5709/347733/5714/5691/3800/5688/5686/84790/730/4728/5689/1535/4706/3915/4684/7384/5290/1351/29796/775/27089/6390/3708/4713/779/4716/3312/10383/147700/4696/5692/4722/6262/54539/1347/4726/5708/440567/5702/733/79861/5693/5719/1327/7385/10376/7419/4723/2534/10975/1349/374291/1329/3709/5704/5595/4700/5694/6263/51079/7386/7277/6647/4704/90550/2932/2903/11047/5701/581/293/4695/4685/56…	128
hsa05016	hsa05016	Huntington disease	142/3186	306/8135	0.00512863	0.051908	0.0410618	292/1537/9377/5690/5709/347733/5714/5691/3800/5436/5688/5686/84790/1175/4728/5689/4706/5438/7384/5432/1351/29796/27089/2876/8701/6390/3708/4713/4716/5441/10383/147700/11258/5434/493869/4696/5692/25981/4722/54539/1347/4726/5708/440567/5702/79861/5693/5719/1327/7385/10376/7419/4723/10975/1349/374291/1329/5704/5978/4700/3092/5694/51079/7386/7277/6647/1767/4704/10120/2776/11047/5701/581/10540/1742/56…	142
hsa03010	hsa03010	Ribosome	78/3186	158/8135	0.00543301	0.0533714	0.0422194	6193/6227/6183/65003/6176/3921/6203/7311/51264/51081/10573/6188/6175/6229/6217/51073/6158/6141/6209/55052/6137/6181/51021/6170/6234/64960/6182/6202/2197/6142/219927/6132/25873/29093/6155/51116/6187/64928/6235/11224/6205/54948/6154/64979/51069/6208/6128/64965/6150/64963/6223/6123/6231/6207/6133/64981/6138/55168/4736/6189/6139/29088/124995/63875/6159/29074/6222/11222/6230/6204/6134/79590/6228/28998…	78
hsa03050	hsa03050	Proteasome	27/3186	46/8135	0.00559911	0.0534316	0.042267	5690/5709/5714/5691/5688/5686/5689/5696/5699/5692/5708/5702/5720/5693/5719/5698/5704/5694/10197/11047/5701/5721/143471/5695/10213/5687/9491	27
hsa04714	hsa04714	Thermogenesis	110/3186	232/8135	0.00581171	0.0539198	0.0426532	5346/6199/1537/9377/6595/6195/4728/64223/2641/4706/7384/1351/55818/29796/27089/6390/4713/4716/6654/7248/28958/25915/51780/4696/2260/4722/54539/1347/4726/440567/788/84987/1327/7385/4723/60/10975/1349/111/374291/1329/5592/6198/2181/4700/6655/6598/116228/284184/51079/7386/285521/4704/1355/4695/71/5603/108/1337/1386/1340/4708/1385/3265/6603/4720/126328/57492/55967/4725/9167/6196/4698/84335/4717/5568/…	110
hsa05415	hsa05415	Diabetic cardiomyopathy	97/3186	203/8135	0.00704589	0.0636034	0.0503134	292/7042/1537/9377/5499/4728/1535/4706/5350/7384/5290/1351/10000/29796/27089/6390/4713/4716/2936/7043/4696/4722/6262/54539/1347/4726/440567/7046/1327/7385/7419/4723/10975/1349/2539/374291/1329/4700/51079/7386/4704/2932/185/1281/293/4695/208/5603/1337/5590/1340/4708/4720/126328/9945/1278/55967/4725/9167/4698/4717/2597/4710/7381/183/4707/5295/7048/4715/5501/6513/5602/7417/23236/1277/4689/4714/10105…	97
hsa05222	hsa05222	Small cell lung cancer	48/3186	92/8135	0.00740235	0.0650628	0.0514679	3915/5290/10000/1285/7188/1869/3910/4843/2335/1019/578/3912/1282/898/3685/51426/10319/3688/1870/1286/1284/5915/581/208/3918/1871/1164/3674/595/7189/10912/9618/5295/3909/1163/7187/3913/329/4609/207/79444/4616/3911/1021/5728/842/284217/22798	48
hsa04110	hsa04110	Cell cycle	63/3186	126/8135	0.00827851	0.070898	0.0560838	7042/5347/51529/991/51433/4998/8318/4176/4174/9133/472/1869/7043/9088/5111/4171/891/1019/2810/1874/898/7027/10459/1870/9978/896/2932/8454/994/890/25906/990/1871/5001/595/9126/10912/3065/4175/27127/7531/2033/246184/1387/494551/4609/25/11200/4616/10735/4085/1021/5934/51343/64682/983/10744/10274/9232/9700/10971/9184/85417	63
hsa04730	hsa04730	Long-term depression	33/3186	60/8135	0.00910118	0.0741413	0.0586495	4842/2775/3708/5605/673/3479/5592/3709/5595/2767/369/2770/5518/2776/3265/8681/2773/2892/5593/1394/6261/100137049/8605/2911/2977/5516/23236/5321/773/2891/3480/5331/5579	33
hsa04978	hsa04978	Mineral absorption	33/3186	60/8135	0.00910118	0.0741413	0.0586495	340024/482/477/4499/493/6546/4496/483/4495/3163/4494/4493/79901/475/113235/478/538/7779/492/1811/2495/2512/55630/3162/490/54822/491/6550/6547/30061/4502/486/1317	33
hsa04926	hsa04926	Relaxin signaling pathway	64/3186	129/8135	0.00969079	0.0759407	0.0600728	2783/5290/408/10000/4842/1285/2775/6654/10022/4843/5605/59/7046/111/5595/6655/1282/399694/7424/2787/2770/1286/1284/1281/2782/2790/208/5603/108/59345/5590/1386/59350/1385/3265/1278/4322/7422/5568/2773/5295/7048/409/5602/23236/1906/6464/4312/1277/2785/114/207/107/54331/6714/6013/2792/5331/10681/1388/2277/5567/4313/5600	64
hsa05146	hsa05146	Amoebiasis	52/3186	102/8135	0.0097768	0.0759407	0.0600728	7042/3915/5290/1285/7043/3910/4843/2335/733/3912/1282/2767/3554/10319/1286/1284/5052/2776/1281/912/7099/3918/5868/1278/5869/2920/383/5568/5295/2774/1437/5269/7414/23236/3909/1277/7097/3913/5878/87/107/2921/7850/913/3911/7124/5331/5567/5579/3684/284217/22798	52
hsa05223	hsa05223	Non-small cell lung cancer	38/3186	72/8135	0.0128088	0.0972303	0.076914	3800/5290/10000/6654/1869/5605/673/1019/578/2309/5595/6655/11186/51426/369/5979/1870/5915/581/208/1871/3265/595/10912/3798/5295/2064/572/5336/207/4616/1021/6777/3799/842/4233/6789/5579	38
hsa04120	hsa04120	Ubiquitin mediated proteolysis	69/3186	142/8135	0.0133259	0.0989077	0.0782409	118424/8651/51529/991/51433/10273/7311/867/9040/57448/6923/11065/27338/26232/9978/868/7328/8925/8454/23624/8065/10055/7325/23291/25898/25906/26272/64750/9320/7332/7189/10401/11060/27339/26091/7319/7322/6477/997/7329/4214/9690/246184/9817/55120/329/9246/23295/55958/79444/8945/7316/5071/57154/11059/51343/64682/9820/7327/51366/7317/8924/8450/55585/7334/134111/54926/7337/326	69
hsa04151	hsa04151	PI3K-Akt signaling pathway	159/3186	354/8135	0.0139442	0.100359	0.0793893	6199/2321/7148/8515/1311/2690/64223/3915/2783/5290/4915/10000/1943/1978/2246/4804/1285/7060/6654/7248/5649/56034/3910/5605/2335/2260/7058/1280/2250/3479/1129/4803/51378/3679/1019/7059/2309/3912/6198/9863/1299/22801/5595/92579/6655/1282/898/2323/3685/9223/7424/2787/80310/10319/3688/2252/5528/3791/5523/8817/1286/896/1284/256076/7143/5518/2932/57121/2782/2790/208/5159/2324/2248/1293/6794/59345/9180/…	159
hsa04611	hsa04611	Platelet activation	61/3186	124/8135	0.0141224	0.100359	0.0793893	5499/4638/5290/10000/387/3708/23365/84876/60/2534/111/5592/3709/7094/5595/3688/2770/4659/2811/2776/1281/208/71/5603/108/5590/9475/6093/3674/1278/8681/5568/2773/340156/5295/5593/2815/5501/5908/100137049/8605/9138/2977/23236/2244/1277/114/5321/5336/207/107/5023/8673/103910/3690/6714/64805/5331/5567/2149/5600	61
hsa04540	hsa04540	Gap junction	45/3186	88/8135	0.0145444	0.101205	0.0800582	3357/347733/84790/3708/6654/10383/56034/5605/79861/10376/111/5592/3709/5595/6655/2767/80310/10746/2770/3356/7277/2776/5159/108/3265/5568/2773/5593/153/347688/2911/2977/23236/203068/7082/114/107/2697/5155/983/6714/5607/5331/5567/5579	45
hsa03030	hsa03030	DNA replication	21/3186	36/8135	0.0152347	0.103844	0.0821461	4176/5982/4174/10535/5425/23649/5111/4171/5424/6742/6119/84153/5427/5557/4175/56655/5985/54107/2237/3978/5981	21
hsa01230	hsa01230	Biosynthesis of amino acids	39/3186	75/8135	0.0158813	0.104007	0.0822744	4548/435/2875/7167/3418/5230/2023/3421/7086/6888/65263/3419/587/586/6472/5211/2806/6470/2752/383/2597/226/95/3420/162417/5831/445/729020/1431/5223/441531/4143/50/440/5315/29920/5313/6120/29968	39
hsa05214	hsa05214	Glioma	39/3186	75/8135	0.0158813	0.104007	0.0822744	5290/10000/6654/1869/5605/673/3479/57118/1019/578/5595/6655/399694/51426/369/1870/581/208/5159/808/1871/3265/595/10912/5295/51806/6464/5336/8536/207/815/4616/814/1021/5155/5728/3480/5579/805	39
hsa04261	hsa04261	Adrenergic signaling in cardiomyocytes	72/3186	150/8135	0.0163138	0.104785	0.0828899	5499/5350/482/477/781/10000/775/493/6331/779/6546/5502/785/6262/7169/7139/111/483/5595/6332/5528/2770/5523/5518/2776/185/208/808/5603/108/1386/4634/478/1385/492/5521/5568/2773/183/51806/11069/153/5501/28227/154/5516/23236/147/114/490/148/491/55844/7170/5520/207/107/815/489/102723475/70/6547/3784/3753/5331/1388/5567/486/5600/6548/805/7171	72
hsa05130	hsa05130	Pathogenic Escherichia coli infection	92/3186	197/8135	0.0176232	0.111059	0.0878533	5010/347733/4629/10552/1366/4628/5063/84790/834/8772/137075/10061/387/9368/1365/9073/10383/6188/23365/375/7132/79861/10376/60/7009/2534/578/3654/5595/4644/3554/9181/3688/7277/10093/10095/5062/1364/57121/7456/4615/29108/581/9265/71/8936/5603/4640/24146/7099/4691/9475/2846/6093/7189/7100/653857/2597/9266/10097/4651/347688/147945/57180/5602/9138/49861/203068/7082/5781/81873/7430/4671/257397/25/4627/…	92
hsa04925	hsa04925	Aldosterone synthesis and secretion	49/3186	98/8135	0.0183879	0.113733	0.0899681	482/477/775/493/3708/779/5587/84876/57118/111/483/3709/2767/1583/5138/3284/2776/185/808/108/1386/478/1385/492/5568/183/949/1589/3777/51806/23236/23683/8912/4881/114/490/491/3762/8536/107/815/814/5581/5331/1388/5567/5579/6770/805	49
hsa05213	hsa05213	Endometrial cancer	31/3186	58/8135	0.0187733	0.114005	0.0901836	5290/10000/1496/6654/83439/5605/673/578/2309/5595/6655/51426/369/324/2932/581/208/3265/595/10912/3611/5295/51176/2064/572/4609/207/29119/4616/5728/842	31
hsa05414	hsa05414	Dilated cardiomyopathy	48/3186	96/8135	0.0194815	0.116193	0.0919147	7042/8515/5350/781/775/779/6546/6444/7043/785/6262/7169/7139/3479/60/3679/111/22801/3685/3688/2010/1756/71/108/1674/4634/3674/3678/5568/183/3696/6445/153/3672/114/3694/7170/107/489/7124/3690/70/6547/4000/5567/284217/6442/7171	48
hsa01232	hsa01232	Nucleotide metabolism	43/3186	85/8135	0.0207294	0.121467	0.0960865	2987/158/1841/7083/204/144811/4832/79077/1503/353/4860/124583/3615/30833/6241/4830/7378/54963/978/7498/100/158067/7371/221264/7084/3614/953/102157402/3704/955/7298/270/1635/5169/1854/51292/29922/271/26289/272/8623/83549/84284	43
hsa04114	hsa04114	Oocyte meiosis	63/3186	131/8135	0.0224806	0.129457	0.102407	5499/5347/51529/991/51433/6195/5241/367/9133/3708/9088/3479/891/111/3709/5595/898/5528/9748/10459/9978/5518/8454/808/6790/80315/5603/23291/108/25906/245711/64506/6196/22849/9126/5568/286151/51806/5501/27127/7531/5516/246184/114/107/132864/815/8945/10734/4085/64682/983/10744/3480/442590/9232/285955/9700/10971/5567/5600/5530/805	63
hsa05410	hsa05410	Hypertrophic cardiomyopathy	45/3186	90/8135	0.0231868	0.130671	0.103367	7042/8515/781/775/779/6546/6444/7043/785/6262/7169/7139/3479/60/3679/22801/3685/3688/2010/1756/71/1674/4634/3674/3678/183/5571/3696/6445/51422/3672/1906/3694/7170/489/7124/3690/5565/70/6547/4000/5563/284217/6442/7171	45
hsa04010	hsa04010	MAPK signaling pathway	132/3186	294/8135	0.0238281	0.130671	0.103367	7042/2321/6195/4915/9448/781/408/10000/1943/775/2246/4804/4763/5921/779/57551/6654/5536/3312/7043/56034/7867/785/5605/2260/673/7046/7132/2250/3479/2005/4208/4803/51378/3654/5595/6655/2323/3554/7424/80310/2252/369/3791/10746/5922/8817/25780/9479/51701/3556/5495/5062/8986/4615/994/208/5159/2324/2248/5603/22808/9693/1386/4296/3265/2254/7189/285/6196/51295/10912/7422/8681/5568/7786/7048/284/4137/5908…	132
hsa04713	hsa04713	Circadian entrainment	48/3186	97/8135	0.0241973	0.130671	0.103367	2783/775/4842/2775/3708/6262/111/5592/5595/6263/2787/117/2770/2776/2903/2782/2790/808/5187/108/59345/1385/116/5568/2773/2892/5593/51806/6261/2977/23236/8912/2785/114/3762/107/815/2891/8863/2893/54331/2792/5331/10681/2905/5567/5579/805	48
hsa05017	hsa05017	Spinocerebellar ataxia	68/3186	143/8135	0.0242563	0.130671	0.103367	292/5690/5709/5714/5691/2259/5688/5686/6310/5689/5290/10000/3708/23369/5649/5692/6095/5708/5702/5693/146227/5719/7419/3709/5704/5694/90550/3516/2776/2903/11047/5701/30849/293/208/9706/22863/7436/2892/5295/6261/60673/2081/2911/5602/7417/23236/4976/143471/342371/5695/10213/10105/773/207/2891/3748/489/9821/5687/5289/55102/4287/5331/2905/4800/10524/5579	68
hsa01521	hsa01521	EGFR tyrosine kinase inhibitor resistance	40/3186	79/8135	0.0246884	0.130888	0.103539	6199/5290/10000/1978/3084/4763/6654/56034/5605/673/3479/2309/6198/5595/6655/399694/80310/369/3791/2932/581/208/5159/3265/7422/5295/9470/2064/6464/572/5336/207/2247/5155/5728/6714/3480/558/4233/5579	40
hsa04972	hsa04972	Pancreatic secretion	50/3186	102/8135	0.0265135	0.138367	0.109455	22802/7220/482/477/760/387/5320/493/3708/6262/5322/1358/111/483/3709/1359/64600/5644/8399/5646/23436/2776/3778/1360/108/478/492/1811/5908/886/23236/1179/1131/114/490/5645/491/107/280/9635/4218/489/26279/3784/5331/8671/6522/5579/486/6548	50
hsa04970	hsa04970	Salivary secretion	46/3186	93/8135	0.0271851	0.13969	0.110501	482/477/4842/493/3708/1471/54831/111/483/5592/3709/6263/2776/1755/3778/808/108/478/492/5568/5593/51806/153/154/2977/362/23236/1131/147/114/490/148/491/6844/107/280/5542/5555/5331/5554/6522/5567/5579/486/6548/805	46
hsa01210	hsa01210	2-Oxocarboxylic acid metabolism	12/3186	19/8135	0.0295245	0.149412	0.118192	2875/3418/3421/3419/587/586/2806/95/3420/162417/1431/50	12
hsa05225	hsa05225	Hepatocellular carcinoma	78/3186	168/8135	0.0315773	0.15733	0.124456	6199/7042/6595/8322/2950/5290/10000/4259/4040/6654/83439/1869/7043/5605/2948/673/7046/54361/60/1019/578/6198/5595/6655/6598/399694/51426/2949/369/1870/324/10587/2932/581/1855/208/71/7477/196528/1871/55193/3265/6603/4257/595/57492/10912/9446/5295/7048/51412/51176/86/6464/11211/9817/122011/572/3162/5336/4609/207/55274/4616/1021/29117/7471/5728/7481/3480/7479/7015/6601/8321/4233/4258/5579/8323	78
hsa03040	hsa03040	Spliceosome	69/3186	147/8135	0.0320312	0.15733	0.124456	84844/57819/83443/144983/9410/10907/25804/51645/51690/10569/10189/3312/6432/25949/9775/22827/23451/55119/6633/10450/11325/4809/8683/10465/8559/11017/153527/6636/6628/58517/22916/3192/9343/51503/55660/6631/6434/9939/10915/10946/23350/27339/7919/6632/22985/57461/3306/988/57187/22938/6626/100534599/25766/9128/11338/26121/4670/10713/220988/9879/5093/10291/3190/4116/1655/10084/6430/84991/27258	69
hsa04145	hsa04145	Phagosome	71/3186	152/8135	0.0337024	0.16125	0.127556	533/347733/79659/9114/84790/200576/1311/1535/3135/4842/7060/534/10383/1783/7058/9341/79861/10376/60/7059/9296/718/81035/3111/3685/1781/53407/3688/9902/7277/1780/83547/3105/71/6890/7099/10312/8411/5868/715/653509/811/5869/8685/10333/3678/7057/949/347688/6441/4973/203068/1778/7097/529/4689/5878/9550/10952/3106/3134/525/3112/3690/5289/8417/22925/50617/3107/948/3684	71
hsa04068	hsa04068	FoxO signaling pathway	62/3186	131/8135	0.0337948	0.16125	0.127556	7042/5347/3276/5290/10000/9133/472/6654/114907/5896/7043/5605/673/7046/3479/891/2309/5595/92579/6655/11337/23710/369/51701/604/208/10365/5603/6794/23411/3265/595/5106/901/10912/5571/5295/8698/7048/51422/1901/2911/5602/2033/2290/1387/9140/207/4616/9456/23678/5934/9454/5728/5565/3480/5563/3643/6789/1263/5600/85417	62
hsa05220	hsa05220	Chronic myeloid leukemia	38/3186	76/8135	0.0350018	0.16174	0.127944	7042/5290/10000/6654/867/1869/7043/5605/673/7046/1019/578/5595/6655/399694/51426/369/1870/861/581/208/1871/3265/595/10912/5295/3065/7048/9846/5781/6464/572/4609/25/207/4616/1021/6777	38
hsa04720	hsa04720	Long-term potentiation	34/3186	67/8135	0.0351818	0.16174	0.127944	5499/6195/775/3708/5502/5605/673/3709/5595/369/2776/2903/808/3265/6196/5568/51806/5501/5908/2911/2033/23236/1387/114/107/815/814/2891/5331/2905/5567/5579/5530/805	34
hsa04390	hsa04390	Hippo signaling pathway	73/3186	157/8135	0.0353503	0.16174	0.127944	25937/1740/7042/92597/5499/659/8322/332/7003/2246/1496/151449/8200/50855/83439/7043/6657/122786/7046/54361/60/26524/11186/10413/60485/324/3397/896/392255/5518/2932/166824/1742/1855/71/7477/23291/5590/658/595/5521/3993/1739/85407/7048/4771/7159/3996/5501/51176/657/7531/9113/5516/11211/329/4609/55844/5520/2736/29119/5054/8945/652/7471/174/7481/7479/10971/8321/23418/8323/7004	73
hsa04927	hsa04927	Cortisol synthesis and secretion	33/3186	65/8135	0.0373478	0.16857	0.133347	775/3708/56246/779/8622/84876/5087/111/3709/2767/1583/3284/2776/185/108/1386/1385/5568/183/949/1589/3777/3776/23236/8912/114/107/1586/2516/5331/1388/5567/6770	33
hsa01240	hsa01240	Biosynthesis of cofactors	71/3186	153/8135	0.0393108	0.174873	0.138334	10327/158/57026/23057/3145/248/7389/29925/65220/326625/554235/387787/2356/204/4832/1503/8630/587/27235/84274/586/54658/7390/5372/27010/6472/200895/4830/23498/80308/8566/2937/60490/1355/80347/54995/6999/93100/79717/2235/7367/158067/6470/79646/64802/4351/221264/51805/1352/7364/2990/102157402/25902/7372/5805/8942/6697/4143/79799/9249/10797/29922/54576/29926/55163/3620/210/26289/9054/29968/51004	71
hsa05418	hsa05418	Fluid shear stress and atherosclerosis	65/3186	139/8135	0.0397916	0.174873	0.138334	25828/659/2950/1535/5290/10000/387/4259/6612/4205/2948/7132/4208/60/7341/3685/3554/2949/9181/3791/93/208/71/10365/808/5603/5590/658/4257/3674/7422/7412/858/9446/5295/6613/387082/90/51806/445/657/5602/1906/9817/3162/1003/6383/207/7850/857/59341/652/6885/5175/5155/7124/3690/6714/5607/5563/4258/4313/5600/805/92	65
hsa04914	hsa04914	Progesterone-mediated oocyte maturation	49/3186	102/8135	0.0414262	0.179693	0.142146	5347/51529/51433/6195/5241/5290/10000/9133/9088/673/3479/891/111/5595/369/10459/2770/5140/994/208/890/6790/80315/5603/108/25906/245711/64506/6196/22849/5568/2773/5295/5602/246184/114/207/107/132864/4085/51343/64682/983/3480/442590/285955/5567/5600/85417	49
hsa04150	hsa04150	mTOR signaling pathway	72/3186	156/8135	0.0432828	0.182082	0.144036	6199/58528/6195/8322/64223/10542/389541/6396/5290/55004/10000/387/1978/4040/6654/534/7248/6249/5605/673/253260/7132/3479/54361/9296/6198/5595/51256/6655/10641/10325/2932/1855/208/7477/83667/6794/57600/3265/9706/6196/9894/84335/81617/5295/84219/81929/28956/9470/11211/8131/529/9550/207/525/92335/7471/5728/7124/7481/8140/3480/5563/7479/729438/3643/8321/5579/51719/8323/96459/79899	72
hsa05100	hsa05100	Bacterial invasion of epithelial cells	38/3186	77/8135	0.0435996	0.182082	0.144036	10552/5290/387/1496/867/2335/79767/60/1793/399694/3688/10459/10093/10095/71/9844/8936/23607/653857/3678/391/858/3611/10097/5295/57180/7414/6464/81873/29119/1211/857/9564/6714/1785/1212/79658/4233	38
hsa00510	hsa00510	N-Glycan biosynthesis	26/3186	50/8135	0.0440335	0.182082	0.144036	54344/6184/1650/10195/57134/8704/11282/440138/56052/199857/144245/79087/146664/10905/1603/57171/22845/4249/6185/8818/84920/1798/4245/29929/4247/29880	26
hsa05132	hsa05132	Salmonella infection	111/3186	249/8135	0.0441576	0.182082	0.144036	347733/3800/10552/25828/79659/5063/84790/834/8772/5290/10000/8677/387/6993/79792/10383/6188/147700/83439/5216/1783/11258/5605/375/7132/79861/838/10376/60/5286/578/3654/5595/79443/112574/1781/7277/10093/10095/1780/83547/51209/10120/55770/10398/4615/29108/581/10540/79026/57381/9265/208/71/9844/5603/8655/7099/9475/5868/3265/7189/7100/5869/6281/653857/2597/10333/3798/391/9266/10097/10640/347688/51626…	111
hsa00532	hsa00532	Glycosaminoglycan biosynthesis - chondroitin sulfate / dermatan sulfate	12/3186	20/8135	0.047934	0.194189	0.153613	55454/126792/9469/64131/337876/22856/50515/11285/51363/55790/29940/113189	12
hsa04024	hsa04024	cAMP signaling pathway	99/3186	221/8135	0.0482566	0.194189	0.153613	5499/5021/1816/2641/5350/482/477/5290/10000/387/775/493/779/5605/6262/673/84876/1129/111/483/5348/3355/5595/117/7074/2770/1395/2737/5733/4659/1909/1258/2903/10398/5140/1908/208/5727/808/108/9475/478/1385/6093/2550/492/116/5568/2773/2892/6755/84152/5295/1394/2735/51806/11069/153/5501/5908/5141/154/5602/2033/1906/4301/1387/4881/572/114/490/491/7434/9568/8310/1907/207/107/815/814/2891/170589/2893/22…	99
hsa04072	hsa04072	Phospholipase D signaling pathway	68/3186	148/8135	0.0533827	0.208721	0.165109	5290/10000/387/6654/7248/56034/2914/5605/375/160851/10555/2534/111/9162/8525/5595/6655/399694/80310/57121/185/9265/208/5159/108/22808/8612/8613/2846/3265/8681/56895/8526/183/9266/5295/11069/9846/2206/100137049/8605/2911/23236/5781/6464/114/5321/5336/10161/554/2916/207/552/107/56894/2917/22800/4254/5155/55326/1785/5331/3643/8611/3815/2149/2912/6237	68
hsa04213	hsa04213	Longevity regulating pathway - multiple species	31/3186	62/8135	0.0533914	0.208721	0.165109	6199/5290/10000/3312/3479/1410/111/2309/6198/6647/81570/208/108/23411/3265/84335/5568/5571/5295/3065/51422/3306/114/207/107/9474/5565/3480/5563/3643/5567	31
hsa04961	hsa04961	Endocrine and other factor-regulated calcium reabsorption	27/3186	53/8135	0.0537425	0.208721	0.165109	1175/482/477/9365/5745/493/6546/483/793/2776/478/492/5568/624/23236/490/491/160/1211/2099/6547/1785/1212/5331/5567/5579/486	27
hsa04725	hsa04725	Cholinergic synapse	53/3186	113/8135	0.0557479	0.214021	0.169301	2783/5290/10000/775/2775/3708/779/3786/56479/1129/2534/111/3709/1143/1136/5595/2767/2787/2770/2776/2782/2790/208/3785/108/59345/1385/3265/5568/2773/5295/60482/23236/1131/2785/114/1132/773/207/107/815/814/54331/1141/3784/6572/2792/3768/5331/10681/3761/5567/5579	53
hsa05133	hsa05133	Pertussis	37/3186	76/8135	0.0570056	0.216362	0.171153	834/387/720/4843/1072/3654/718/5595/710/3688/2770/3394/4615/29108/808/5603/716/7099/727/715/1073/653509/7189/3659/3678/2773/353376/51806/5602/721/114548/7124/725/3684/5600/51561/805	37
hsa05010	hsa05010	Alzheimer disease	165/3186	384/8135	0.0658802	0.247236	0.195576	637/292/1537/9377/5690/5709/347733/5714/5691/3800/5688/5686/84790/8322/4728/5689/4706/8772/7384/5290/1351/10000/29985/29796/775/27089/4842/6390/4040/3708/4713/779/4716/10383/147700/4843/4696/5692/6622/5605/50507/3028/4722/54539/1347/4726/5708/440567/5702/673/7132/79861/5693/5719/823/1327/7385/10376/7419/4723/54361/10975/1349/374291/1329/23516/3709/5704/5595/1020/4700/5694/6263/369/51079/7386/7277…	165
hsa04964	hsa04964	Proximal tubule bicarbonate reclamation	13/3186	23/8135	0.0691458	0.251686	0.199096	762/482/477/760/1468/483/2744/478/5106/2747/6550/8671/486	13
hsa05412	hsa05412	Arrhythmogenic right ventricular cardiomyopathy	37/3186	77/8135	0.0694061	0.251686	0.199096	88/8515/781/775/1496/779/6546/6444/83439/785/6262/1000/60/3679/22801/3685/3688/2010/1756/71/1674/3674/3678/3696/6445/3672/51176/5318/3694/29119/2697/489/3690/6547/4000/284217/6442	37
hsa01522	hsa01522	Endocrine resistance	46/3186	98/8135	0.0700804	0.251686	0.199096	6199/5290/10000/6654/1869/5605/673/10498/3479/111/1019/6198/5595/6655/399694/4855/369/1870/581/208/4853/8202/5603/108/1871/3265/595/5568/5295/5469/638/5602/2064/6464/4854/572/114/207/107/2099/6714/1565/3480/5567/4313/5600	46
hsa04750	hsa04750	Inflammatory mediator regulation of TRP channels	46/3186	98/8135	0.0700804	0.251686	0.199096	3357/5499/5290/3708/3479/55515/4803/111/3709/5029/3554/3356/3556/2776/808/623/5603/108/8681/5568/624/5295/239/51806/5501/100137049/8605/5602/23236/5588/114/5321/5336/5583/107/815/59341/79054/6714/5581/5331/5567/5579/5732/5600/805	46
hsa00071	hsa00071	Fatty acid degradation	22/3186	43/8135	0.0734597	0.261016	0.206477	3033/35/1892/1632/126/33/2181/128/113612/130/30/2639/10449/8310/81616/127/37/125/126129/1376/2180/39	22
hsa04727	hsa04727	GABAergic synapse	42/3186	89/8135	0.0743756	0.261489	0.206851	2783/775/2775/779/6529/2561/111/11337/23710/2787/2770/5334/2782/2790/2744/108/59345/81539/66008/140679/2550/92745/2752/5568/2773/54407/2785/114/2563/9568/4905/773/107/2570/54331/6714/2792/2569/10681/2558/5567/5579	42
hsa04520	hsa04520	Adherens junction	34/3186	71/8135	0.0831731	0.289373	0.228909	387/10580/1496/83439/2260/7046/60/2534/5595/5797/51701/2241/71/8936/8826/7048/5819/51176/7414/2033/2064/7082/5787/4301/1387/5795/87/29119/6885/10810/6714/3480/3643/4233	34
hsa03450	hsa03450	Non-homologous end-joining	8/3186	13/8135	0.0869512	0.299399	0.236839	2547/3981/10111/4361/2237/27343/64421/7518	8
hsa05211	hsa05211	Renal cell carcinoma	33/3186	69/8135	0.0883897	0.301247	0.238301	7042/5063/5290/10000/6654/7043/5605/673/6923/2271/5595/6655/369/9978/2113/5062/208/3265/7422/5295/5908/9915/405/6513/2033/5781/1387/572/57144/207/10298/5155/4233	33
hsa04144	hsa04144	Endocytosis	109/3186	251/8135	0.0907028	0.306007	0.242067	3800/10552/1175/381/6456/408/387/84313/3135/3312/50855/867/50807/253725/22841/9765/375/26119/7046/51324/9922/440073/868/10093/10095/79643/2870/832/5119/387680/1601/10193/119016/23624/7456/9265/3105/23111/5590/8411/64750/5868/3265/11267/29924/7189/51160/5869/55680/653857/3798/830/858/9266/829/23325/10097/7048/55738/93343/5662/51699/30844/156/11021/80230/409/9230/57180/6455/3306/81873/6643/9815/587…	109
hsa00270	hsa00270	Cysteine and methionine metabolism	25/3186	51/8135	0.0972864	0.323716	0.256075	4191/4548/6723/1036/191/4357/23743/1788/4507/144811/7263/587/586/55256/2806/2937/23382/160287/10768/51074/58478/3939/4143/262/29968	25
hsa04934	hsa04934	Cushing syndrome	69/3186	155/8135	0.0982022	0.323716	0.256075	8322/4297/775/3708/56246/779/83439/1869/8622/5605/673/84876/5087/54361/111/1019/3709/2271/5595/898/2767/1583/2770/1870/1395/324/3284/2932/8085/2776/185/1855/7477/108/1386/1871/1385/595/5568/2773/183/949/1589/1394/3777/3776/5908/51176/405/23236/11211/8912/114/107/1586/815/9049/1021/7471/7481/2516/5331/1388/7479/8321/5567/5929/8323/6770	69
hsa04911	hsa04911	Insulin secretion	40/3186	86/8135	0.0988594	0.323716	0.256075	6616/2641/482/477/27094/775/779/6262/3779/111/483/2767/117/10242/27445/2776/9699/3778/108/1386/478/1385/3782/116/5568/11069/6513/886/23236/1131/114/6844/107/815/2740/5331/1388/5567/5579/486	40
hsa00220	hsa00220	Arginine biosynthesis	12/3186	22/8135	0.10469	0.338049	0.267413	435/2875/4842/4843/2806/2744/2752/383/95/162417/445/2747	12
hsa00190	hsa00190	Oxidative phosphorylation	60/3186	134/8135	0.105691	0.338049	0.267413	533/1537/9377/9114/4728/4706/7384/1351/29796/27089/6390/4713/4716/534/4696/4722/54539/1347/4726/440567/27068/1327/7385/4723/10975/1349/374291/1329/9296/64077/4700/51079/7386/4704/1355/4695/1337/10312/1340/4708/4720/126328/55967/4725/9167/4698/4717/4710/7381/4707/4715/5464/1352/529/4714/9550/525/6389/50617/56901	60
hsa00310	hsa00310	Lysine degradation	30/3186	63/8135	0.106273	0.338049	0.267413	55870/3033/4297/55904/6839/1892/93166/29072/1743/58508/2146/10157/8085/9869/55526/51111/64324/84444/2639/23127/79709/150572/5352/7799/7468/54904/83852/8424/2145/39	30
hsa04211	hsa04211	Longevity regulating pathway	41/3186	89/8135	0.109508	0.345054	0.272955	6199/9370/5290/10000/9365/1978/7248/143686/3479/111/2309/6198/581/208/83667/6794/108/1386/23411/1385/3265/84335/26060/5568/5571/5295/51422/60673/9470/114/207/107/814/9474/5565/9821/3480/1388/5563/3643/5567	41
hsa04152	hsa04152	AMPK signaling pathway	54/3186	120/8135	0.110761	0.345738	0.273496	3952/6199/9370/5290/10000/1978/7248/3479/2309/6198/92579/5528/3953/5523/5211/5518/208/1994/890/6794/23411/1385/595/5106/5521/84335/81617/5571/5295/51422/28227/9230/5516/6319/5210/148/5207/55844/79966/5520/207/4218/92335/6885/126129/5565/3480/5563/3643/948/1938/2997/51719/32	54
hsa03320	hsa03320	PPAR signaling pathway	35/3186	75/8135	0.112144	0.346814	0.274347	729359/2167/5346/9370/10580/376497/440503/10999/33/2181/364/30/5106/3611/10998/1581/2170/4973/6319/4312/28965/79966/8310/2171/336/10062/81616/7316/126129/1376/2169/2180/4023/948/3157	35
hsa04260	hsa04260	Cardiac muscle contraction	40/3186	87/8135	0.115904	0.353243	0.279433	1537/9377/482/7384/477/781/1351/29796/775/27089/779/6546/785/6262/7169/1347/440567/7139/845/1327/7385/10975/1349/1329/483/7386/1337/1340/4634/478/3270/9167/7381/7170/489/70/6547/486/6548/7171	40
hsa04392	hsa04392	Hippo signaling pathway - multiple species	15/3186	29/8135	0.116338	0.353243	0.279433	25937/54798/92597/7003/122786/79633/26524/11186/10413/60485/166824/9770/4771/9113/7004	15
hsa04115	hsa04115	p53 signaling pathway	34/3186	73/8135	0.119003	0.358082	0.28326	637/10572/3486/575/9133/472/143686/3479/891/1019/2810/51246/898/51512/6241/896/581/83667/25898/595/901/10912/7057/6477/84883/64393/5054/11200/4616/1021/5728/92344/983/842	34
hsa04330	hsa04330	Notch signaling pathway	28/3186	59/8135	0.120361	0.358933	0.283934	9541/84441/6310/26508/4855/23462/3516/1855/4853/9794/196403/55534/1840/6868/388585/51107/3065/9253/2033/4854/7091/1387/342371/22938/23493/4242/5986/113878	28
hsa04012	hsa04012	ErbB signaling pathway	39/3186	85/8135	0.122685	0.362626	0.286855	6199/5063/5290/10000/1978/3084/6654/27/867/5605/673/6198/5595/6655/399694/369/868/5062/10718/2932/208/3265/145957/5295/5602/2064/6464/572/5336/4609/25/57144/207/10298/2066/815/6777/6714/5579	39
hsa05208	hsa05208	Chemical carcinogenesis - reactive oxygen species	96/3186	223/8135	0.128293	0.375703	0.297199	292/1537/9377/10327/1545/4728/1535/4706/7384/5290/1351/10000/29796/4259/27089/6390/4713/4716/6654/27/5587/4696/5605/50507/4722/2948/54539/1347/4726/440567/673/873/1327/7385/7419/4723/10975/1349/374291/1329/2309/5595/4700/6655/2949/369/51079/7386/6647/4704/293/4695/208/5603/1571/1337/1340/4708/3265/4720/4257/126328/55967/4725/9167/4698/4717/7422/4710/7381/9446/4707/5295/4715/405/2053/5602/7417/578…	96
hsa04670	hsa04670	Leukocyte transendothelial migration	51/3186	114/8135	0.129359	0.375703	0.297199	5010/1366/1535/5290/137075/387/1365/1496/9073/394/83700/60/6387/3688/2770/1364/10398/71/5603/24146/58494/9475/6093/2773/7412/5295/11069/5908/7414/49861/5781/4301/7430/4478/4689/5336/1003/87/29119/7070/5175/100288814/103910/9564/9076/7410/5579/3684/4313/149461/5600	51
hsa04216	hsa04216	Ferroptosis	20/3186	41/8135	0.135125	0.385741	0.30514	7419/23516/2181/1356/643246/2937/2879/5621/2495/2512/7417/3162/10533/64116/9474/5093/2180/30061/10162/246	20
hsa05219	hsa05219	Bladder cancer	20/3186	41/8135	0.135125	0.385741	0.30514	1869/7380/5605/673/1019/5595/11186/369/1870/1871/3265/595/7422/7057/2064/4312/4609/1612/6714/4313	20
hsa04921	hsa04921	Oxytocin signaling pathway	67/3186	154/8135	0.151276	0.424984	0.336183	5499/4660/5021/4638/781/387/775/2775/3708/779/4637/785/5605/6262/4208/57118/60/111/3709/5595/6263/4882/2770/4659/2776/10398/71/808/108/9475/3265/6093/595/8681/5568/2773/340156/5571/51806/51422/6261/5501/100137049/8605/2977/23236/4881/114/5321/3762/4776/8536/107/815/814/5565/6714/5607/3768/5331/5563/3761/5567/5579/1938/5530/805	67
hsa00030	hsa00030	Pentose phosphate pathway	15/3186	30/8135	0.151417	0.424984	0.336183	132158/7086/6888/2539/5226/51071/5211/25796/2821/226/5236/729020/64080/55276/6120	15
hsa00240	hsa00240	Pyrimidine metabolism	27/3186	58/8135	0.153492	0.425727	0.336771	1841/7083/4832/79077/1503/124583/30833/6241/4830/7378/54963/978/7371/221264/7084/1807/953/955/7372/7298/318/1635/5169/1854/29922/8623/83549	27
hsa00770	hsa00770	Pantothenate and CoA biosynthesis	11/3186	21/8135	0.15423	0.425727	0.336771	587/586/60496/60490/80347/79717/79646/339896/1807/5169/51380	11
hsa05230	hsa05230	Central carbon metabolism in cancer	32/3186	70/8135	0.157525	0.429084	0.339427	9997/5290/3418/10000/4916/5605/2260/2539/5595/5979/5211/208/5159/2744/3265/160287/5295/51548/6513/2064/5163/5223/80201/4609/207/3939/441531/5728/5315/8140/3815/4233	32
hsa04928	hsa04928	Parathyroid hormone synthesis, secretion and action	47/3186	106/8135	0.158952	0.429084	0.339427	408/387/9365/9368/4325/5745/4040/3708/4205/2260/673/11214/4208/111/3709/5595/2767/369/2770/2776/108/1386/1385/4322/5568/2773/4323/4326/860/5141/409/9138/23236/8600/114/3727/50964/4324/107/9826/632/5331/1388/9935/4209/5567/5579	47
hsa04146	hsa04146	Peroxisome	37/3186	82/8135	0.159301	0.429084	0.339427	5827/3418/92960/10005/4843/3155/570/2181/5192/373156/51555/6647/5195/5052/5191/7498/84769/26061/4598/30/10478/5825/55670/55711/283927/2053/10901/5193/5194/4358/196743/8310/5830/26063/2180/225/11264	37
hsa05030	hsa05030	Cocaine addiction	23/3186	49/8135	0.165478	0.442156	0.349767	26086/111/1020/2770/2903/1742/1386/1385/5568/2773/84152/8787/7054/6571/2891/1644/6531/4128/1388/2905/5567/2912/627	23
hsa00983	hsa00983	Drug metabolism - other enzymes	36/3186	80/8135	0.168468	0.446575	0.353263	2950/7083/4259/8824/2948/4832/3615/2949/1066/54658/6241/4830/9/7378/54963/978/1571/7498/7172/7367/4257/7371/7084/9446/3614/7364/1807/2990/3704/7372/1854/79799/29922/54576/4258/83549	36
hsa03015	hsa03015	mRNA surveillance pathway	43/3186	97/8135	0.172395	0.453386	0.358651	5499/51585/26019/10898/132430/10189/9775/5042/5411/23049/81608/29101/140886/9887/29107/5528/5523/55339/26528/5518/22916/124540/9939/65110/1477/5521/10978/7919/5501/8106/28227/22985/65109/1479/5516/64895/55844/5520/23435/100529063/1478/4116/29894	43
hsa05142	hsa05142	Chagas disease	45/3186	102/8135	0.176111	0.455887	0.360629	7042/8772/5290/10000/2775/8837/7043/4843/7046/7132/3654/718/5595/2767/2770/5518/2776/4615/208/5603/7099/811/7189/5521/10333/2773/624/5295/7048/2774/5602/3459/5516/23236/7097/55844/5520/207/5054/107/915/7124/5331/414062/5600	45
hsa04721	hsa04721	Synaptic vesicle cycle	35/3186	78/8135	0.178172	0.455887	0.360629	533/9114/6616/1175/534/6529/6536/9296/246213/10312/140679/6530/6507/6857/6571/529/57030/8775/9550/6844/4905/773/160/1211/525/6505/6531/1785/6572/1212/50617/23025/10814/6534/22999	35
hsa04140	hsa04140	Autophagy - animal	61/3186	141/8135	0.178883	0.455887	0.360629	6199/58528/64223/5290/10000/3708/7248/8837/5605/7405/6198/5595/11337/23710/10325/84971/643246/30849/208/6794/22808/3265/9706/7189/84335/22863/5568/5295/10010/60673/55578/2081/5602/5516/5588/9140/118471/572/1612/10533/207/4218/6885/22800/8673/1965/5728/9451/9474/9821/23192/5289/55102/64422/3480/5563/55014/3146/5567/6237/64419	61
hsa04922	hsa04922	Glucagon signaling pathway	47/3186	107/8135	0.179555	0.455887	0.360629	3276/2641/5531/10000/3708/5837/3709/92579/5211/2776/5140/208/808/108/1386/23411/1385/5106/160287/23235/5568/5571/57223/51806/51422/6513/2033/23236/1387/5223/55671/5207/207/5260/815/3939/441531/126129/5565/5315/5331/5563/5567/2997/5530/805/32	47
hsa05166	hsa05166	Human T-cell leukemia virus 1 infection	94/3186	222/8135	0.180171	0.455887	0.360629	292/7042/51529/991/5902/51433/706/5290/10000/5901/3135/9133/472/4801/1869/7043/5605/7046/7132/2005/8829/7419/111/1019/1959/7094/5595/3111/898/3554/1870/2113/896/581/3105/293/208/890/108/25906/1386/1871/1385/3265/55697/811/595/5568/1739/5423/5295/7048/2874/1437/6513/4214/5602/7417/2033/246184/5971/1387/114/4609/4776/207/2224/107/4215/3106/11200/3134/3601/7850/4085/3112/6777/915/64682/5728/7124/107…	94
hsa04933	hsa04933	AGE-RAGE signaling pathway in diabetic complications	44/3186	100/8135	0.185347	0.465457	0.3682	7042/5290/10000/1285/7043/2335/50507/84812/7046/1019/5595/1282/7424/1286/1284/185/581/1281/208/5603/5590/3265/595/1278/7422/7412/183/5295/7048/5602/23236/1906/1277/5336/207/5054/6777/7124/5581/5331/2277/5579/4313/5600	44
hsa05163	hsa05163	Human cytomegalovirus infection	95/3186	225/8135	0.188138	0.468941	0.370956	6199/637/2783/8772/5290/10000/387/1978/3135/2775/3708/1232/6654/7188/7248/1869/5605/23365/7132/11214/111/1019/578/6198/3709/5595/6655/6387/2767/3685/3554/2787/2770/1870/5733/5731/6376/2932/2776/581/2782/2790/3105/208/6890/808/5603/108/59345/1386/9475/1871/1385/3265/6093/6892/811/595/7422/5568/2773/5295/51806/9138/23236/2785/114/4609/4776/207/107/3106/3134/9826/1021/9564/54331/7124/3690/6714/8717/…	95
hsa05226	hsa05226	Gastric cancer	64/3186	149/8135	0.191345	0.470194	0.371947	6199/7042/8322/5290/10000/2246/1496/4040/6654/83439/1869/7043/5605/673/7046/2250/54361/578/6198/5595/6655/399694/898/51426/2252/369/1870/324/8817/2932/5915/581/1855/208/7477/2248/1871/3265/2254/595/10912/5295/7048/51176/2064/9965/6464/2255/11211/122011/4609/207/29119/8822/4616/2247/7471/7481/7479/7015/8321/4233/2249/8323	64
hsa04710	hsa04710	Circadian rhythm	15/3186	31/8135	0.191456	0.470194	0.371947	6095/6096/9978/8454/1408/5187/23291/1385/5571/51422/8945/8863/79365/5565/5563	15
hsa01212	hsa01212	Fatty acid metabolism	26/3186	57/8135	0.192913	0.470313	0.372041	27349/3033/54898/64834/35/1892/33/2181/9374/7923/51102/54995/6785/401494/30/10449/6319/9524/79966/8310/81616/37/126129/1376/2180/39	26
hsa00564	hsa00564	Glycerophospholipid metabolism	43/3186	98/8135	0.195047	0.47207	0.37343	150763/10400/5320/154141/51365/5322/79143/160851/10555/2819/5833/9162/8525/64600/8399/81490/8612/8613/10908/8681/56895/9926/8526/57678/84803/100137049/8605/23761/5321/10434/254531/9791/56894/56261/26279/5130/55326/375775/10162/1040/8611/196051/11313	43
hsa00860	hsa00860	Porphyrin metabolism	20/3186	43/8135	0.201541	0.476729	0.377116	3145/7389/326625/645/1356/3163/54658/7390/1355/2235/7367/3052/1352/7364/2990/3162/79799/54576/210/2395	20
hsa04931	hsa04931	Insulin resistance	47/3186	108/8135	0.201564	0.476729	0.377116	6199/5499/6195/6945/5290/10000/376497/5837/7132/10999/6198/92579/79660/2932/208/5590/1385/9945/6196/5106/183/5571/5295/51422/5501/10998/6513/5602/5588/5781/28965/207/10062/5507/5728/7124/5565/9882/5581/5563/3643/90673/948/5579/57761/2997/32	47
hsa05032	hsa05032	Morphine addiction	40/3186	91/8135	0.201592	0.476729	0.377116	2783/408/2775/5153/8622/2561/111/2787/2770/5138/2870/5136/5140/2782/2790/108/59345/27115/140679/2550/5568/2773/156/5141/409/2785/114/2563/9568/3762/773/107/2570/54331/2792/2569/10681/2558/5567/5579	40
hsa00900	hsa00900	Terpenoid backbone biosynthesis	11/3186	22/8135	0.203771	0.476729	0.377116	51449/23463/9986/4598/79947/23590/2224/9453/57107/39/3157	11
hsa00350	hsa00350	Tyrosine metabolism	17/3186	36/8135	0.204652	0.476729	0.377116	8639/4282/126/2954/128/1312/2806/130/314/7054/2184/127/125/1644/220074/4128/316	17
hsa05221	hsa05221	Acute myeloid leukemia	30/3186	67/8135	0.205536	0.476729	0.377116	6199/1053/7704/5290/10000/1978/862/6654/83439/5605/1050/673/6198/5595/6655/369/861/208/890/3265/595/5295/51176/1437/572/4609/207/6777/3815/3684	30
hsa00670	hsa00670	One carbon pool by folate	10/3186	20/8135	0.220527	0.507972	0.401831	4548/123263/6472/200895/10841/6470/25902/7298/10797/2618	10
hsa00480	hsa00480	Glutathione metabolism	26/3186	58/8135	0.224942	0.514594	0.40707	6723/2950/3418/4259/2876/2936/4953/493869/2948/2539/79094/373156/2949/6241/5226/2937/494143/4257/2879/2687/9446/51060/124975/290/2878/4258	26
hsa04071	hsa04071	Sphingolipid signaling pathway	51/3186	119/8135	0.229747	0.52201	0.412936	6610/637/5290/10000/387/1903/5605/7132/2534/5595/123099/5528/2770/10715/5523/204219/5518/2776/581/208/5603/5590/9475/3265/6093/5521/2773/624/5295/8698/9846/28227/2206/1901/5602/5516/23236/253782/55844/130367/5520/207/4985/5728/7124/5581/8717/5331/5579/5600/79603	51
hsa04136	hsa04136	Autophagy - other	15/3186	32/8135	0.235901	0.532371	0.421132	64223/11337/23710/84971/30849/9706/60673/5516/9140/10533/9474/23192/5289/55102/64422	15
hsa04923	hsa04923	Regulation of lipolysis in adipocytes	25/3186	56/8135	0.238865	0.53368	0.422168	2167/5346/5290/10000/111/5592/2770/5733/5140/208/108/364/5568/2773/5295/5593/153/154/4881/51099/114/207/107/3643/5567	25
hsa04962	hsa04962	Vasopressin-regulated water reabsorption	20/3186	44/8135	0.239677	0.53368	0.422168	79659/1783/1781/1780/10540/8655/5868/1385/5869/5568/51626/84516/9230/1778/5878/6844/554/4905/5567/360	20
hsa00250	hsa00250	Alanine, aspartate and glutamate metabolism	17/3186	37/8135	0.246961	0.542664	0.429274	57494/158/435/2875/2806/2744/8659/9945/2752/445/80150/2747/7915/339983/56954/440/284716	17
hsa05216	hsa05216	Thyroid cancer	17/3186	37/8135	0.246961	0.542664	0.429274	7175/83439/5605/673/578/10342/5595/51426/5979/581/3265/595/10912/51176/4609/7170/4616	17
hsa01200	hsa01200	Carbon metabolism	49/3186	115/8135	0.251591	0.545658	0.431642	4191/2875/283871/7167/3418/132158/5230/6390/2023/35/1892/3421/7086/6888/5096/3419/2539/2271/1743/8802/6472/5226/128/5211/2806/25796/55902/6470/2597/2821/226/26007/3420/729020/2747/1431/5223/80201/4200/8310/83440/441531/50/6389/5315/5313/39/6120/29968	49
hsa04726	hsa04726	Serotonergic synapse	49/3186	115/8135	0.251591	0.545658	0.431642	3357/7220/2783/775/2775/3708/779/673/3751/2561/111/3709/3355/5595/2787/369/2770/3356/2776/2782/2790/59345/3265/8681/5568/2773/239/3359/100137049/8605/23236/2785/5321/6571/1562/3762/773/351/1644/54331/4128/1565/2792/5331/10681/5567/5579/246/3360	49
hsa05212	hsa05212	Pancreatic cancer	33/3186	76/8135	0.25774	0.550655	0.435595	6199/7042/5290/10000/1869/7043/673/7046/1019/578/6198/5595/51426/5888/369/1870/581/208/1871/595/10912/7422/5295/7048/5602/2064/572/207/4616/1021/9459/675/842	33
hsa03430	hsa03430	Mismatch repair	11/3186	23/8135	0.259052	0.550655	0.435595	5982/5425/5111/5424/6742/6119/27030/5395/5985/3978/5981	11
hsa04614	hsa04614	Renin-angiotensin system	11/3186	23/8135	0.259052	0.550655	0.435595	7064/4012/1359/57486/5550/2028/185/183/290/5476/4311	11
hsa00430	hsa00430	Taurine and hypotaurine metabolism	8/3186	16/8135	0.260489	0.550655	0.435595	1036/2327/570/2687/124975/339896/2328/51380	8
hsa00620	hsa00620	Pyruvate metabolism	21/3186	47/8135	0.263326	0.55315	0.437569	4191/10327/126/2271/128/3029/130/55902/9380/5106/160287/197257/4200/3939/127/125/5315/2739/5313/39/32	21
hsa04920	hsa04920	Adipocytokine signaling pathway	30/3186	69/8135	0.268112	0.559684	0.442738	3952/9370/10000/7132/2181/92579/3953/7133/181/208/6794/5106/5571/4794/51422/6513/5602/5588/5781/207/81616/4793/126129/7124/5565/2180/8717/5563/948/32	30
hsa04066	hsa04066	HIF-1 signaling pathway	46/3186	109/8135	0.287776	0.597002	0.472258	6199/2321/5290/10000/1978/5230/2023/4843/5605/3479/51378/6923/6198/5595/9978/5211/208/7099/285/7422/160287/2597/226/5295/284/405/6513/9470/3459/2033/2064/5163/1906/1387/3162/80201/5336/207/5054/7010/815/3939/2872/3480/3643/5579	46
hsa04722	hsa04722	Neurotrophin signaling pathway	50/3186	119/8135	0.290455	0.598839	0.473712	57498/6195/5290/4915/10000/387/4916/4804/6654/5605/673/4803/3654/2309/5595/6655/399694/2932/581/208/808/5603/10603/3265/7189/6196/5295/4794/51806/5908/4214/5602/7531/5781/6464/572/4909/5336/27018/25/207/4215/815/814/4793/5607/8767/627/5600/805	50
hsa05215	hsa05215	Prostate cancer	41/3186	97/8135	0.297894	0.608901	0.481671	6935/2950/5290/367/10000/6654/83439/1869/56034/5605/2260/673/3479/2078/5595/6655/898/80310/369/1870/2932/208/5159/1871/1385/3265/4314/595/3645/5295/51176/2033/2064/1387/572/207/7850/5155/5728/3480/842	41
hsa04975	hsa04975	Fat digestion and absorption	19/3186	43/8135	0.298981	0.608901	0.481671	5320/19/376497/5322/10999/10555/8694/64600/8399/2806/4547/8612/8613/949/26279/2169/8611/948/39	19
hsa04918	hsa04918	Thyroid hormone synthesis	32/3186	75/8135	0.304543	0.614394	0.486016	7270/482/477/2876/3708/2936/493869/111/483/432/3709/4036/2776/108/1386/478/1385/9601/5568/23236/114/5172/107/2878/53905/5331/1388/5567/5579/389434/486/213	32
hsa04910	hsa04910	Insulin signaling pathway	57/3186	137/8135	0.306204	0.614394	0.486016	6199/8651/5499/5573/5290/10000/10580/1978/6654/7248/867/5605/23433/673/5837/6198/5595/92579/6655/399694/369/79660/868/2932/5140/208/808/5590/10603/3265/5106/5575/5568/5571/5295/51806/51422/5501/9470/5602/6464/572/80201/207/5260/2319/2872/5507/5565/5563/3643/90673/5313/5567/2997/805/32	57
hsa04610	hsa04610	Complement and coagulation cascades	36/3186	85/8135	0.308739	0.614394	0.486016	730/720/5104/733/718/710/1380/10544/1675/2160/1191/3075/2/623/716/727/715/2162/2161/624/2157/721/3078/2244/1378/5054/10878/5648/7035/3818/725/5627/5340/2149/3684/2153	36
hsa05170	hsa05170	Human immunodeficiency virus 1 infection	87/3186	212/8135	0.309037	0.614394	0.486016	6199/637/5063/2783/8772/5290/10000/3135/9133/2775/3708/472/7188/1174/5605/7132/1072/891/6923/578/3654/6198/3709/5595/2767/2787/162/2770/9978/7133/8905/5062/8454/2776/8065/4615/581/2782/2790/3105/208/6890/808/5603/23291/59345/7099/3265/1073/6892/811/7189/2773/5295/51806/10053/5602/572/2785/7097/494551/5336/4776/57144/207/10298/3106/3134/8945/6885/915/54331/7124/983/8717/2792/10681/3107/8450/842/85…	87
hsa00330	hsa00330	Arginine and proline metabolism	22/3186	51/8135	0.327437	0.647124	0.511907	6723/113451/4842/79814/4953/4843/65263/2628/2593/283208/2806/548596/55748/8659/383/5625/5831/26/1159/262/4128/29920	22
hsa00910	hsa00910	Nitrogen metabolism	8/3186	17/8135	0.332809	0.653871	0.517245	762/766/759/760/2752/768/2747/765	8
hsa00920	hsa00920	Sulfur metabolism	5/3186	10/8135	0.346013	0.675839	0.534622	23474/4357/7263/10380/58472	5
hsa05031	hsa05031	Amphetamine addiction	29/3186	69/8135	0.354556	0.688498	0.544636	5499/775/111/2903/808/1386/23411/1385/5568/2892/84152/3065/51806/5501/7054/6571/815/814/2891/2893/1644/6531/4128/1388/2905/5567/5579/5530/805	29
hsa04935	hsa04935	Growth hormone synthesis, secretion and action	49/3186	119/8135	0.357912	0.690997	0.546613	3483/8651/3486/2690/5290/10000/775/3708/779/6654/5605/3479/111/3709/5595/6655/399694/2767/2770/2932/2776/208/5603/108/1386/1385/3265/5568/2773/6755/5295/4214/5602/2033/23236/6464/1387/114/5336/207/107/6777/9564/5331/1388/5567/5579/2692/5600	49
hsa04960	hsa04960	Aldosterone-regulated sodium reabsorption	16/3186	37/8135	0.362869	0.6915	0.547011	482/477/5290/6338/3479/483/2810/5595/478/5295/3291/3643/53828/5579/3758/486	16
hsa00604	hsa00604	Glycosphingolipid biosynthesis - ganglio series	7/3186	15/8135	0.364383	0.6915	0.547011	27090/6489/2583/81849/6482/8869/2720	7
hsa00730	hsa00730	Thiamine metabolism	7/3186	15/8135	0.364383	0.6915	0.547011	248/204/27010/158067/26289/9054/84284	7
hsa03420	hsa03420	Nucleotide excision repair	20/3186	47/8135	0.368196	0.694788	0.549612	2073/5982/5425/2968/5111/5424/9978/2074/6119/7508/5427/4331/56655/7507/5985/2068/54107/3978/8450/5981	20
hsa00592	hsa00592	alpha-Linolenic acid metabolism	11/3186	25/8135	0.380674	0.713858	0.564697	5320/5322/64600/8399/30/8681/100137049/8605/5321/8310/26279	11
hsa00020	hsa00020	Citrate cycle (TCA cycle)	13/3186	30/8135	0.384714	0.713858	0.564697	4191/3418/6390/3421/3419/2271/1743/8802/5106/3420/1431/50/6389	13
hsa01523	hsa01523	Antifolate resistance	13/3186	30/8135	0.384714	0.713858	0.564697	2356/10057/6472/200895/9429/113235/6470/239/6573/7298/7124/2618/8714	13
hsa05110	hsa05110	Vibrio cholerae infection	21/3186	50/8135	0.391251	0.71503	0.565624	533/9114/534/375/60/9296/71/10945/10312/9601/5568/11014/7082/529/5336/9550/10952/525/3784/50617/5567	21
hsa05144	hsa05144	Malaria	21/3186	50/8135	0.391251	0.71503	0.565624	7042/1311/7060/3039/7043/7058/7059/4615/7099/7057/1440/7412/1378/7097/975/6383/5175/3043/7124/4233/948	21
hsa04917	hsa04917	Prolactin signaling pathway	29/3186	70/8135	0.391768	0.71503	0.565624	8651/5290/10000/6654/5605/9655/2309/5595/6655/399694/2932/208/5603/3265/595/3659/5295/7054/5602/6464/8600/207/1586/2099/6777/1154/6714/5617/5600	29
hsa04550	hsa04550	Signaling pathways regulating pluripotency of stem cells	58/3186	143/8135	0.395906	0.718656	0.568492	1749/659/8322/5290/3625/10000/463/3977/3624/5605/6657/2260/3572/3479/54361/5978/5595/55183/4211/324/3397/2932/3720/93/1855/208/9869/7477/5603/648/658/3265/9314/5295/90/657/11211/3175/6498/4838/4609/207/652/3626/2247/7471/9421/130399/7481/4090/3480/5080/7479/8321/5600/7994/8323/92	58
hsa00230	hsa00230	Purine metabolism	52/3186	128/8135	0.399016	0.720385	0.56986	2987/158/3000/5153/8622/204/144811/4832/111/353/4860/124583/3615/30833/6241/4882/5138/4830/5136/5140/108/7498/27115/100/158067/8654/221264/3614/5236/5141/2977/953/102157402/3704/955/4881/114/318/270/5169/107/374659/51292/2618/29922/5146/271/26289/272/55276/55821/84284	52
hsa04912	hsa04912	GnRH signaling pathway	38/3186	93/8135	0.406262	0.727839	0.575757	775/3708/779/6654/5605/111/3709/5595/6655/2767/10746/2776/808/5603/108/3265/8681/5568/4323/51806/100137049/8605/4214/5602/23236/114/5321/107/4215/815/6714/5331/5567/5579/4313/5600/2798/805	38
hsa00061	hsa00061	Fatty acid biosynthesis	8/3186	18/8135	0.407623	0.727839	0.575757	27349/2181/7923/51102/54995/81616/2180/32	8
hsa05171	hsa05171	Coronavirus disease - COVID-19	93/3186	232/8135	0.409804	0.727839	0.575757	6193/6227/730/834/5290/6176/3921/6203/720/7311/6188/6175/6229/6217/6158/6141/6209/7132/733/6137/3572/8829/6181/6170/6234/3654/718/5595/6202/2197/6142/6132/25873/6155/1675/6187/6235/11224/185/4615/6205/6154/5603/716/7099/727/6208/6128/715/4314/7189/2162/6868/1440/6223/6123/5295/6231/6207/6133/1437/6138/5602/721/4736/2244/6189/6139/7187/4312/7097/5610/4938/5336/6773/6159/6222/5648/3454/6885/4793/11…	93
hsa05217	hsa05217	Basal cell carcinoma	26/3186	63/8135	0.411861	0.727839	0.575757	8322/83439/374654/54361/578/51426/2737/324/2932/581/1855/5727/7477/10912/2735/51176/8643/11211/2736/4616/652/7471/7481/7479/8321/8323	26
hsa04916	hsa04916	Melanogenesis	41/3186	101/8135	0.420537	0.739259	0.584791	8322/2775/83439/4286/5605/54361/111/5595/2770/4157/2932/2776/1855/7477/808/108/1385/3265/5568/2773/51806/51176/2033/23236/1906/11211/1387/114/107/815/4254/7471/7481/5331/7479/8321/3815/5567/5579/8323/805	41
hsa05210	hsa05210	Colorectal cancer	35/3186	86/8135	0.424921	0.743055	0.587793	6199/7042/332/5290/10000/387/6654/83439/7043/5605/673/7046/578/6198/5595/6655/51426/369/324/2932/581/208/3265/595/10912/26060/5295/7048/51176/5602/572/4609/207/4616/842	35
hsa04976	hsa04976	Bile secretion	36/3186	89/8135	0.441141	0.763814	0.604214	482/477/760/5244/123264/570/111/483/54658/9429/108/478/7367/5568/949/57835/200931/8431/10998/1581/7364/6513/114/9971/107/6555/6550/79799/54576/8671/6522/343/5567/486/6548/8714	36
hsa04080	hsa04080	Neuroactive ligand-receptor interaction	140/3186	353/8135	0.443139	0.763814	0.604214	5697/797/3952/3357/5021/706/2690/1816/2641/6869/5745/165829/6865/2901/1903/10022/2914/4828/2743/4987/1146/1129/8001/2561/3355/1143/718/1136/4986/4922/5029/117/5644/4923/3953/1395/5733/5731/3356/5539/4157/5025/5746/4295/5646/2925/1909/2903/185/114131/2922/1908/887/10203/623/2908/5027/727/2846/59350/8862/2550/56413/116/1268/624/183/2892/6755/4887/1394/2894/8698/11255/10316/5179/136/153/56923/2837/1…	140
hsa00790	hsa00790	Folate biosynthesis	11/3186	26/8135	0.443652	0.763814	0.604214	248/2356/55034/873/57016/200895/5092/7054/5860/5805/6697	11
hsa04929	hsa04929	GnRH secretion	26/3186	64/8135	0.451937	0.774086	0.612341	7220/5290/408/10000/775/3708/779/5605/3709/5595/2767/2776/208/3265/2550/3782/5295/7223/409/23236/8912/9568/3762/207/5331/5579	26
hsa00513	hsa00513	Various types of N-glycan biosynthesis	16/3186	39/8135	0.465739	0.791392	0.62603	6184/1650/10195/57134/8704/11282/440138/56052/199857/79087/10905/1603/83539/6185/4245/4247	16
hsa00040	hsa00040	Pentose and glucuronate interconversions	14/3186	34/8135	0.469148	0.791392	0.62603	10327/9365/51084/51181/54658/57016/7367/7364/729020/2990/27294/79799/54576/6120	14
hsa03020	hsa03020	RNA polymerase	14/3186	34/8135	0.469148	0.791392	0.62603	5436/5438/5432/84265/5441/5434/171568/51728/81488/5439/5430/9533/5437/661	14
hsa04977	hsa04977	Vitamin digestion and absorption	10/3186	24/8135	0.477164	0.800868	0.633526	5948/9963/8029/113235/949/6573/113278/9227/25974/686	10
hsa03013	hsa03013	Nucleocytoplasmic transport	43/3186	108/8135	0.481175	0.803562	0.635657	7175/26019/6396/5901/3841/25909/10189/6612/9775/5411/5903/7341/79228/29107/55706/51808/79023/4927/64901/22916/5905/8563/9939/65110/79902/8086/7919/6613/3838/387082/8021/23214/22985/81929/65109/7329/57187/1434/9688/9670/23039/3842/4116	43
hsa05231	hsa05231	Choline metabolism in cancer	39/3186	98/8135	0.487172	0.808526	0.639584	6199/5290/10000/1978/6654/7248/56034/5605/160851/6198/9162/8525/5595/6655/80310/208/5159/8936/8612/8613/3265/8681/8526/5295/100137049/60482/8605/5602/6584/5321/80736/10434/207/56261/5155/5130/10810/8611/5579	39
hsa00380	hsa00380	Tryptophan metabolism	17/3186	42/8135	0.488989	0.808526	0.639584	1545/3033/1892/130013/1743/23498/64577/6999/55526/2639/26/8942/1644/4128/3620/316/39	17
hsa04215	hsa04215	Apoptosis - multiple species	13/3186	32/8135	0.499431	0.811865	0.642226	637/8772/332/4804/57448/7132/578/581/5602/329/79444/27429/842	13
hsa04979	hsa04979	Cholesterol metabolism	20/3186	50/8135	0.505323	0.811865	0.642226	706/19/26119/10948/7419/4036/4018/949/1581/7417/29116/8435/336/4043/341/4023/9217/948/6646/6770	20
hsa00062	hsa00062	Fatty acid elongation	11/3186	27/8135	0.505922	0.811865	0.642226	11332/3033/54898/64834/1892/9374/51102/6785/401494/10449/9524	11
hsa01040	hsa01040	Biosynthesis of unsaturated fatty acids	11/3186	27/8135	0.505922	0.811865	0.642226	11332/54898/64834/570/6785/401494/30/6319/9524/79966/8310	11
hsa04966	hsa04966	Collecting duct acid secretion	11/3186	27/8135	0.505922	0.811865	0.642226	9114/760/534/9296/10312/529/1188/9550/525/10723/50617	11
hsa00830	hsa00830	Retinol metabolism	27/3186	68/8135	0.509524	0.811865	0.642226	220/126/8694/8630/54658/128/10170/130/7367/8228/7364/10901/339761/1562/54884/8608/9227/127/79799/125/9249/6121/54576/316/29785/340665/1592	27
hsa05131	hsa05131	Shigellosis	97/3186	247/8135	0.51063	0.811865	0.642226	6199/10552/58528/834/826/5290/10000/387/3708/472/7188/7311/5216/84812/375/7132/823/60/2309/6198/3709/7094/718/1793/23048/5595/3554/9181/3688/10325/9978/10093/10095/643246/2932/8454/10398/4615/29108/581/9265/30849/208/71/9844/8936/5603/23291/7099/9475/6093/7189/7100/84335/7335/22863/653857/3678/9266/3611/10097/5295/7322/1437/57180/5602/7414/23236/5588/81873/9140/4671/257397/10616/54874/80201/5336/…	97
hsa02010	hsa02010	ABC transporters	18/3186	45/8135	0.510696	0.811865	0.642226	10060/10350/5244/11194/19/23460/24/23457/10057/9429/6890/5825/340273/22/225/10351/8714/10349	18
hsa04742	hsa04742	Taste transduction	34/3186	86/8135	0.512885	0.811865	0.642226	775/6338/5153/2914/3355/6326/5136/50838/259289/342372/2550/5568/50832/3359/5024/2911/23236/259293/259290/1131/114/50840/9568/259295/773/5726/259292/6335/5331/2558/5567/259296/50839/29850	34
hsa05145	hsa05145	Toxoplasmosis	44/3186	112/8135	0.525522	0.824154	0.651947	7042/8651/3915/10000/2775/3312/7043/3910/4843/7132/3654/3912/5595/3111/10319/3688/2770/4615/208/5603/7099/3918/7189/2773/5602/3459/3306/3909/572/7097/3913/329/10105/207/79444/3911/6885/4793/3112/7124/842/284217/5600/22798	44
hsa05167	hsa05167	Kaposi sarcoma-associated herpesvirus infection	76/3186	194/8135	0.526342	0.824154	0.651947	637/2783/8772/5290/10000/3135/3708/1232/7311/83439/1869/5605/7132/3572/1019/578/3709/718/5595/2787/1870/643246/2932/581/2782/2790/3105/208/808/5603/59345/1871/1385/3265/595/285/22863/7422/2920/5295/51806/51176/1437/5602/3459/2033/1387/7187/2785/5610/5336/4609/4776/6773/207/2921/3106/3134/3454/7316/1021/2247/344807/5155/54331/6714/5289/8717/64422/2792/10681/3107/842/5600/5530/805	76
hsa05207	hsa05207	Chemical carcinogenesis - receptor activation	83/3186	212/8135	0.528051	0.824154	0.651947	6199/1545/6195/5241/332/5290/367/408/10000/1978/775/4259/3841/779/6654/1869/5605/2948/2250/111/6198/1143/1136/5595/6655/2949/2252/54658/2770/8817/896/604/208/4853/2248/108/1386/990/1385/3265/7367/4257/9314/2254/595/6196/7422/5568/2773/9446/5295/3838/153/7364/405/154/409/2053/2255/572/8600/114/4609/773/207/107/8822/2099/10728/9049/79799/2247/6777/7471/54576/1141/6714/1388/9970/5567/4258/5579/2249	83
hsa00630	hsa00630	Glyoxylate and dicarboxylate metabolism	12/3186	30/8135	0.531715	0.826013	0.653417	4191/283871/132158/5096/6472/55902/6470/9380/2752/1431/50/39	12
hsa04913	hsa04913	Ovarian steroidogenesis	20/3186	51/8135	0.550099	0.850616	0.67288	1545/3479/111/1583/3284/1588/108/8681/5568/949/100137049/8605/114/5321/107/1586/3480/3643/5567/6770	20
hsa00051	hsa00051	Fructose and mannose metabolism	13/3186	33/8135	0.555065	0.850668	0.672921	7167/29925/3795/5372/57016/5211/4351/226/26007/5210/80201/5207/29926	13
hsa04514	hsa04514	Cell adhesion molecules	58/3186	149/8135	0.555227	0.850668	0.672921	1272/5010/57689/1366/1002/1462/4684/8506/137075/6900/3135/1365/22871/9073/54413/1000/83700/57863/3111/57502/3685/9369/3688/23705/5797/9672/1364/257194/8174/3105/4685/214/947/24146/58494/57555/7412/3696/5819/49861/23114/1003/6383/22854/3106/3134/5175/9378/3112/100288814/3384/23308/9076/64101/1001/3107/3684/149461	58
hsa04370	hsa04370	VEGF signaling pathway	23/3186	59/8135	0.56074	0.854018	0.67557	5290/10000/7867/5605/5595/3791/208/5603/3265/7422/8681/5295/100137049/8605/572/5321/5336/207/6714/842/5579/5600/5530	23
hsa05160	hsa05160	Hepatitis C	61/3186	157/8135	0.562527	0.854018	0.67557	5010/637/1366/8772/5290/137075/10000/1365/9073/6654/8837/1869/5605/673/7132/1019/578/5595/6655/369/1870/10197/5518/2932/1364/581/208/24146/1871/3265/595/7189/5521/949/5295/6041/7531/49861/5516/7187/572/5610/4938/4609/55844/975/5520/6773/207/10062/3454/1021/1965/100288814/9451/7124/9076/8717/10971/842/149461	61
hsa00650	hsa00650	Butanoate metabolism	11/3186	28/8135	0.566093	0.855544	0.676777	3033/35/1892/3155/54988/65985/56898/622/7915/39/3157	11
hsa00010	hsa00010	Glycolysis / Gluconeogenesis	26/3186	67/8135	0.570263	0.857964	0.678692	10327/7167/5230/2023/126/92579/128/5211/130/55902/5106/160287/2597/2821/226/5236/5223/80201/83440/3939/441531/127/125/5315/5313/55276	26
hsa00512	hsa00512	Mucin type O-glycan biosynthesis	14/3186	36/8135	0.576367	0.859404	0.679831	117248/27090/442117/57452/64409/2650/55808/728819/6482/8693/114805/11226/55568/9245	14
hsa00760	hsa00760	Nicotinate and nicotinamide metabolism	14/3186	36/8135	0.576367	0.859404	0.679831	23057/65220/554235/4860/30833/4837/93100/23411/64802/51547/51548/5169/23409/316	14
hsa04062	hsa04062	Chemokine signaling pathway	74/3186	192/8135	0.598201	0.886704	0.701427	2783/5290/408/10000/387/1232/6654/6370/673/111/2309/5595/6655/399694/6387/2787/10344/7074/2770/2870/6376/2932/2776/6356/2782/2790/208/9844/108/59345/5590/9475/3265/6093/2920/5568/2773/5196/5295/5908/6367/156/2826/409/23236/6464/6360/572/2785/114/5336/6773/207/107/2921/2833/4793/6777/6358/9564/54331/6714/58191/6846/2792/5331/10681/5567/7410/5579/414062/6369/131890/6363	74
hsa01524	hsa01524	Platinum drug resistance	28/3186	73/8135	0.600323	0.886704	0.701427	637/2950/8772/332/5290/10000/4259/472/5980/2948/7155/578/5595/2949/581/208/538/4257/9446/5295/2064/572/7507/329/207/842/4258/1317	28
hsa00563	hsa00563	Glycosylphosphatidylinositol (GPI)-anchor biosynthesis	10/3186	26/8135	0.60264	0.886704	0.701427	8733/93183/2822/51604/9091/8818/9487/84720/94005/80055	10
hsa04664	hsa04664	Fc epsilon RI signaling pathway	26/3186	68/8135	0.607864	0.890467	0.704404	3596/5290/10000/6654/5605/2534/5595/6655/208/5603/3265/8681/3567/5295/9846/2206/100137049/1437/8605/5602/5321/5336/207/7124/7410/5600	26
hsa03250	hsa03250	Viral life cycle - HIV-1	24/3186	63/8135	0.616086	0.898571	0.710814	4131/5901/4130/4300/5300/27125/5903/25920/11168/6598/5478/79643/905/23299/51497/7936/5045/2033/1387/636/27183/9638/7469/85363	24
hsa00591	hsa00591	Linoleic acid metabolism	11/3186	29/8135	0.623036	0.90084	0.712609	5320/5322/64600/8399/1571/8681/100137049/8605/5321/26279/246	11
hsa04744	hsa04744	Phototransduction	11/3186	29/8135	0.623036	0.90084	0.712609	3000/9187/1258/2782/808/8787/51806/2792/2979/131890/805	11
hsa00561	hsa00561	Glycerolipid metabolism	23/3186	61/8135	0.639588	0.914306	0.723261	10327/150763/132158/154141/160851/10555/8694/9162/8525/2717/57016/8612/8613/56895/8526/26007/57678/84803/56894/55326/4023/8611/196051	23
hsa00590	hsa00590	Arachidonic acid metabolism	23/3186	61/8135	0.639588	0.914306	0.723261	5740/5320/2876/493869/80142/5322/873/64600/113612/8399/11283/1571/2687/8681/239/100137049/8605/2053/5321/10728/26279/2878/246	23
hsa00260	hsa00260	Glycine, serine and threonine metabolism	15/3186	40/8135	0.643445	0.914306	0.723261	8639/132158/29958/2628/2593/6472/23464/6470/9380/314/5223/441531/4128/29968/1757	15
hsa05033	hsa05033	Nicotine addiction	15/3186	40/8135	0.643445	0.914306	0.723261	2561/246213/2903/140679/2892/2563/57030/773/2570/2891/2893/1141/2569/2905/2558	15
hsa00360	hsa00360	Phenylalanine metabolism	6/3186	16/8135	0.646037	0.914306	0.723261	8639/4282/2806/314/1644/4128	6
hsa04915	hsa04915	Estrogen signaling pathway	52/3186	138/8135	0.67103	0.94284	0.745833	5241/5290/10000/2775/3708/6654/3312/5605/8648/111/3709/5595/6655/399694/2770/2776/208/8202/808/108/1386/1385/3265/2550/3880/5568/2773/5295/51806/2911/23236/3306/6464/54474/114/10499/9568/3762/207/107/2099/3858/3860/390792/3857/6714/3882/5331/1388/5567/4313/805	52
hsa04625	hsa04625	C-type lectin receptor signaling pathway	39/3186	104/8135	0.671844	0.94284	0.745833	834/5290/10000/387/3708/602/23365/3709/1959/5595/868/29108/208/808/5603/22808/3265/3659/1540/5295/51806/6367/5602/5971/5781/5336/4776/6773/207/22800/114548/7124/6714/1263/5600/51561/5530/6237/805	39
hsa00130	hsa00130	Ubiquinone and other terpenoid-quinone biosynthesis	4/3186	11/8135	0.683746	0.952712	0.753643	27235/84274/51805/51004	4
hsa00565	hsa00565	Ether lipid metabolism	18/3186	49/8135	0.687063	0.952712	0.753643	5320/5322/64600/5050/9514/8399/8612/8613/8681/100137049/8605/5321/254531/5168/7368/26279/8611/284161	18
hsa05134	hsa05134	Legionellosis	21/3186	57/8135	0.687436	0.952712	0.753643	57396/834/3312/375/1195/718/1937/4615/29108/7099/7100/2920/3297/3306/4671/1378/7097/2921/7124/842/3684	21
hsa04130	hsa04130	SNARE interactions in vesicular transport	12/3186	33/8135	0.690829	0.953458	0.754233	9341/10228/53407/6811/415117/6844/6843/9527/8673/662/8417/55014	12
hsa04666	hsa04666	Fc gamma R-mediated phagocytosis	36/3186	97/8135	0.696774	0.95391	0.75459	6199/10552/5290/10000/50807/1072/6198/1793/5595/10093/10095/208/8936/8612/8613/1073/8681/653857/10097/5295/9846/4651/100137049/8605/57180/81873/5321/5336/207/10810/5581/1785/8611/4082/7410/5579	36
hsa05416	hsa05416	Viral myocarditis	22/3186	60/8135	0.699546	0.95391	0.75459	637/3135/27/6444/60/2534/8672/3111/3105/1756/71/595/6445/25/3106/3134/857/3112/3107/842/284217/6442	22
hsa00600	hsa00600	Sphingolipid metabolism	19/3186	52/8135	0.699724	0.95391	0.75459	6610/123099/2717/2583/10715/9514/204219/8612/8613/253782/130367/7357/2720/7368/55331/129807/8611/2581/79603	19
hsa04141	hsa04141	Protein processing in endoplasmic reticulum	64/3186	171/8135	0.707299	0.957009	0.757042	118424/6184/1650/285126/23640/6396/10273/267/6748/11231/3312/10956/10113/57134/823/1410/578/55741/7095/7353/26232/133022/9978/8454/54431/26270/581/3300/10960/22872/6746/55666/811/10905/9601/1603/6400/258010/7322/2081/5602/80700/3306/10134/23190/5610/6185/10952/55757/9373/56886/56605/5071/1965/80331/9451/7327/10808/80267/4287/1649/1388/81567/55829	64
hsa00120	hsa00120	Primary bile acid biosynthesis	6/3186	17/8135	0.71268	0.957009	0.757042	10005/10858/570/9420/10998/1581	6
hsa00514	hsa00514	Other types of O-glycan biosynthesis	17/3186	47/8135	0.713459	0.957009	0.757042	117248/285203/8704/442117/57452/727936/64409/283464/23127/79709/728819/8693/114805/11226/4242/5986/55568	17
hsa04973	hsa04973	Carbohydrate digestion and absorption	17/3186	47/8135	0.713459	0.957009	0.757042	482/477/5290/10000/483/92579/208/478/5295/2542/23236/80201/207/280/5331/5579/486	17
hsa00052	hsa00052	Galactose metabolism	11/3186	31/8135	0.724145	0.967457	0.765307	2584/8704/92579/2717/2582/57016/5211/5236/80201/2720/55276	11
hsa05202	hsa05202	Transcriptional misregulation in cancer	72/3186	193/8135	0.727922	0.968629	0.766233	2138/2321/6935/3486/1053/7704/4297/4804/5218/51804/862/6495/472/221037/4286/4300/1050/5087/3479/2005/4208/578/2078/2115/51426/4211/6760/4299/1051/861/5966/581/604/8091/890/648/905/1671/5090/4314/84444/4005/10912/2892/860/3065/51513/8464/7048/1437/9915/26471/3206/8861/4094/3248/329/4609/5081/7468/5079/8938/4616/7850/4291/30012/2313/1649/3480/4233/1655/3684	72
hsa00140	hsa00140	Steroid hormone biosynthesis	22/3186	61/8135	0.733369	0.970795	0.767947	1545/79154/8630/7923/1583/54658/1312/3284/1588/1571/9420/7367/1589/1581/7364/1646/3291/1586/6783/79799/220074/54576	22
hsa03060	hsa03060	Protein export	8/3186	23/8135	0.737008	0.970795	0.767947	11231/28972/7095/6728/10952/58477/196294/5018	8
hsa05161	hsa05161	Hepatitis B	60/3186	162/8135	0.738269	0.970795	0.767947	637/7042/8772/332/5290/10000/6654/1869/7043/5605/673/7046/5111/7419/3654/1959/5595/843/6655/898/369/1870/4615/581/208/890/5603/7099/1386/1871/1385/3265/1654/3339/7189/353376/5295/7048/4214/5602/2033/1387/7187/572/7097/4609/4776/6773/207/3454/6885/6777/7124/6714/64135/1388/10971/842/5579/5600	60
hsa04668	hsa04668	TNF signaling pathway	41/3186	112/8135	0.742636	0.972707	0.76946	192111/8772/5290/10000/602/7188/8837/7132/5595/843/7424/7133/1051/6376/8986/208/5603/1386/1385/4314/3659/2920/4323/7412/5295/1437/5602/1906/7187/257397/329/11035/207/2921/6885/7124/8717/3600/1388/2277/5600	41
hsa04657	hsa04657	IL-17 signaling pathway	34/3186	94/8135	0.758123	0.985504	0.779582	51433/3596/8772/7188/1673/5595/1051/2932/6356/1994/5603/27189/4314/7189/4322/2920/9618/1440/3567/84818/1437/5602/7187/4312/29761/257397/3727/2921/6280/6885/7124/6278/8717/5600	34
hsa05120	hsa05120	Epithelial cell signaling in Helicobacter pylori infection	25/3186	70/8135	0.761806	0.985504	0.779582	533/9114/534/5803/83700/9296/1445/5603/58494/10312/6868/2920/5602/7082/5781/529/5336/9550/2921/525/6714/150084/50617/4233/5600	25
hsa00603	hsa00603	Glycosphingolipid biosynthesis - globo and isoglobo series	5/3186	15/8135	0.762979	0.985504	0.779582	2717/6489/4668/6482/8706	5
hsa05135	hsa05135	Yersinia infection	50/3186	137/8135	0.767416	0.985504	0.779582	10552/6195/834/5290/10000/387/5605/2335/23365/60/3654/1793/5595/3688/10093/10095/2932/2776/7456/4615/29108/208/71/9844/5603/7099/9475/6093/7189/6196/653857/3678/391/10097/5295/64283/57180/5602/9138/81873/9815/207/6885/2533/114548/9564/7124/6714/7410/5600	50
hsa03460	hsa03460	Fanconi anemia pathway	19/3186	54/8135	0.769065	0.985504	0.779582	201254/5980/51426/5888/2178/353497/29089/51455/6119/2189/9894/55120/5395/11201/80233/80198/2175/675/2177	19
hsa00511	hsa00511	Other glycan degradation	6/3186	18/8135	0.770109	0.985504	0.779582	2519/2517/4126/2720/129807/175	6
hsa04930	hsa04930	Type II diabetes mellitus	16/3186	46/8135	0.775404	0.988492	0.781946	8651/9370/5290/775/5595/5590/5295/5602/80201/773/7124/5581/5315/3643/5313/777	16
hsa04310	hsa04310	Wnt signaling pathway	61/3186	167/8135	0.783269	0.99291	0.785441	144165/166336/8322/23002/387/6424/343637/4040/83439/6423/54361/9978/324/896/51701/57680/23500/2932/8454/29964/1855/7477/23291/5176/9475/6422/595/5568/85407/6477/51176/5602/2033/23236/11211/7091/1387/122011/4609/4776/50964/80319/815/8945/284654/6885/7471/27130/7481/56998/6425/5331/7479/57216/8321/5567/5579/8607/8549/5530/8323	61
hsa00534	hsa00534	Glycosaminoglycan biosynthesis - heparan sulfate / heparin	8/3186	24/8135	0.784815	0.99291	0.785441	2134/126792/9348/222537/2135/64131/11285/3340	8
hsa03440	hsa03440	Homologous recombination	14/3186	41/8135	0.792712	0.999116	0.79035	472/5425/7517/5424/5888/6742/6119/10111/8438/29086/4361/80198/51720/675	14
hsa05323	hsa05323	Rheumatoid arthritis	33/3186	93/8135	0.798324	1	0.791049	533/7042/2321/9114/534/3589/7043/9296/3111/6387/7099/10312/4314/7422/2920/284/1437/4312/8600/7097/529/9550/10673/2921/7010/525/3112/7124/3600/50617/414062/51561/54	33
hsa04210	hsa04210	Apoptosis	49/3186	136/8135	0.800085	1	0.791049	637/84790/8772/332/5290/2021/10000/1677/3708/472/8837/5605/7132/79861/823/10376/4803/60/578/3709/5595/843/7277/6708/581/208/71/3265/10912/84823/5295/1512/2081/5602/572/329/6709/839/207/1519/4616/1965/9451/7124/4000/1649/8717/27429/842	49
hsa04064	hsa04064	NF-kappa B signaling pathway	37/3186	104/8135	0.803252	1	0.791049	472/7188/8837/7132/3654/6387/3554/4615/23085/7099/7189/10912/2920/7412/1540/353376/7329/128178/5971/5588/7187/257397/29775/8600/329/5336/79092/10673/2921/4616/6885/7706/7124/8717/84433/5579/6363	37
hsa04640	hsa04640	Hematopoietic cell lineage	35/3186	99/8135	0.811483	1	0.791049	3589/3111/2323/3554/1380/3590/928/2811/7066/947/912/3674/3678/1440/3567/2815/3672/1437/290/1378/2057/921/7850/913/3112/4254/915/7124/3690/4311/924/3815/948/930/3684	35
hsa04137	hsa04137	Mitophagy - animal	25/3186	72/8135	0.814601	1	0.791049	192111/51024/7311/1869/4286/2309/11337/4077/23710/643246/22808/3265/5602/89941/9927/10133/54543/7316/5071/22800/9451/9474/6714/6237/139341	25
hsa00531	hsa00531	Glycosaminoglycan degradation	6/3186	19/8135	0.818474	1	0.791049	3423/4669/8692/411/2990/2720	6
hsa04070	hsa04070	Phosphatidylinositol signaling system	34/3186	97/8135	0.826004	1	0.791049	3613/3706/200576/5290/3708/84812/160851/5286/9162/3709/8525/9807/5305/8821/808/3705/3707/22876/8526/23262/3631/5295/51806/23236/64768/5336/8871/5728/5289/5331/1040/5579/805/64419	34
hsa05169	hsa05169	Epstein-Barr virus infection	73/3186	202/8135	0.832659	1	0.791049	9541/637/5709/5714/8772/5290/10000/3135/7188/1869/5708/5702/5719/1019/578/3654/5704/3111/898/51426/1380/1870/896/3516/11047/5701/4615/581/3105/208/6890/890/5603/1871/6892/811/595/7189/10912/7431/5295/3065/4794/5602/953/5971/7187/10213/22938/7097/5610/4938/5336/4609/6773/207/3106/3134/3454/4616/6885/1021/4793/3112/915/7124/8717/3107/842/567/930/864/5600	73
hsa01250	hsa01250	Biosynthesis of nucleotide sugars	12/3186	37/8135	0.843734	1	0.791049	29925/2584/2582/5372/9945/4351/2821/5236/80146/80201/29926/55276	12
hsa05143	hsa05143	African trypanosomiasis	12/3186	37/8135	0.843734	1	0.791049	7064/3039/3910/2776/4615/7412/23236/3043/7124/3620/5331/5579	12
hsa00100	hsa00100	Steroid biosynthesis	6/3186	20/8135	0.858393	1	0.791049	10682/50814/1718/8435/1595/6646	6
hsa00515	hsa00515	Mannose type O-glycan biosynthesis	7/3186	23/8135	0.859	1	0.791049	27087/55624/9486/8704/146664/120071/2218	7
hsa00533	hsa00533	Glycosaminoglycan biosynthesis - keratan sulfate	4/3186	14/8135	0.862452	1	0.791049	93010/8704/6482/9435	4
hsa00640	hsa00640	Propanoate metabolism	10/3186	32/8135	0.865205	1	0.791049	79611/35/1892/5096/8802/55902/160287/8310/3939/32	10
hsa00982	hsa00982	Drug metabolism - cytochrome P450	24/3186	72/8135	0.873378	1	0.791049	2327/2950/4259/2948/126/373156/2949/54658/128/1571/130/7367/4257/9446/7364/127/79799/125/54576/4128/1565/316/4258/2328	24
hsa04621	hsa04621	NOD-like receptor signaling pathway	65/3186	184/8135	0.876412	1	0.791049	171389/25828/1535/834/8772/387/7158/3708/22900/7188/79792/22861/1673/838/7419/3709/5595/11337/23710/84168/10628/643246/90550/114769/4615/29108/5603/5027/7099/1671/7189/2920/6041/10010/24145/118429/55914/5602/7417/7531/23236/9140/4671/7187/257397/10616/54822/4938/329/11035/6773/10910/2921/9927/3454/6885/4793/81858/114548/9474/7124/5331/260434/8767/5600	65
hsa00980	hsa00980	Metabolism of xenobiotics by cytochrome P450	26/3186	78/8135	0.881095	1	0.791049	8574/22977/1545/2950/4259/2948/126/873/373156/2949/54658/128/1571/130/7367/4257/9446/7364/27294/127/79799/125/54576/1565/29785/4258	26
hsa04622	hsa04622	RIG-I-like receptor signaling pathway	23/3186	70/8135	0.887555	1	0.791049	8772/5300/843/5603/1654/7189/26007/1540/64343/10010/4214/5602/9140/7187/338376/6885/4793/7706/9474/7124/8717/64135/5600	23
hsa04936	hsa04936	Alcoholic liver disease	49/3186	142/8135	0.892024	1	0.791049	9370/8772/10000/720/83439/50507/126/7132/3654/2309/718/128/2932/4615/208/5603/1571/7099/727/23411/6434/130/595/7189/2920/5571/84818/51422/51176/5602/721/6319/7187/257397/79966/8310/207/2921/127/37/6885/125/126129/7124/5565/8717/5563/5600/32	49
hsa00500	hsa00500	Starch and sucrose metabolism	11/3186	36/8135	0.892508	1	0.791049	5837/92579/283209/2821/2992/5236/80201/5169/280/55276/2997	11
hsa03018	hsa03018	RNA degradation	26/3186	79/8135	0.897211	1	0.791049	57819/132430/25804/2023/80349/51690/54512/5042/170506/9125/140886/1656/56915/84186/5211/167227/255967/23404/28960/10438/4850/23016/22894/9652/54464/27258	26
hsa00280	hsa00280	Valine, leucine and isoleucine degradation	15/3186	48/8135	0.900329	1	0.791049	3033/35/1892/3028/5096/3155/587/586/30/65985/10449/11112/316/39/3157	15
hsa00410	hsa00410	beta-Alanine metabolism	9/3186	31/8135	0.912578	1	0.791049	8639/35/1892/55748/314/339896/1807/8310/51380	9
hsa00340	hsa00340	Histidine metabolism	6/3186	22/8135	0.916596	1	0.791049	3067/10841/55748/26/3034/4128	6
hsa00520	hsa00520	Amino sugar and nucleotide sugar metabolism	15/3186	49/8135	0.917601	1	0.791049	29925/2584/2582/5372/10007/132789/9945/4351/51005/2821/5236/80146/80201/29926/55276	15
hsa04660	hsa04660	T cell receptor signaling pathway	34/3186	104/8135	0.929458	1	0.791049	5063/5290/10000/387/6654/5605/2534/1019/5595/6655/868/5062/2932/208/5603/3265/3567/1739/5295/4794/1437/5602/5588/57144/207/10298/6885/4793/915/7124/7410/84433/5600/5530	34
hsa05340	hsa05340	Primary immunodeficiency	11/3186	38/8135	0.930335	1	0.791049	5896/84876/6890/100/5993/7374/915/64421/3543/930/326	11
hsa00562	hsa00562	Inositol phosphate metabolism	23/3186	73/8135	0.930456	1	0.791049	3613/3706/200576/7167/5290/84812/5286/5305/8821/3705/3707/22876/3631/23236/64768/5336/27124/8871/5728/5289/9651/5331/64419	23
hsa04950	hsa04950	Maturity onset diabetes of the young	7/3186	26/8135	0.934126	1	0.791049	3171/2494/3175/3110/168620/5080/5313	7
hsa05164	hsa05164	Influenza A	58/3186	171/8135	0.934167	1	0.791049	637/292/834/8772/10898/5290/10000/3841/5605/23430/7177/7132/60/1019/578/5595/3111/5644/29107/896/5646/4615/29108/581/293/208/71/7099/64499/5295/3838/6041/8106/9230/3459/2033/1387/7187/5610/5645/4938/6773/207/2224/3454/100529063/1021/4793/3112/7706/1965/114548/7124/8717/64135/5340/842/5579	58
hsa05152	hsa05152	Tuberculosis	61/3186	180/8135	0.939677	1	0.791049	533/637/7042/9114/8772/10000/387/4801/7043/4843/23365/7132/3654/718/5595/843/3111/9902/1051/4615/581/208/808/5603/7099/10312/8411/5868/1385/7189/5869/10333/5993/51806/5602/3459/2033/1387/572/1378/7097/5878/207/815/4802/3112/7124/6714/5289/8717/22925/50617/4800/842/1263/3684/8767/5600/51561/5530/805	61
hsa05140	hsa05140	Leishmaniasis	24/3186	77/8135	0.942557	1	0.791049	7042/1535/7043/4843/3654/718/5595/3111/3688/4615/5603/7099/7189/3459/1378/7097/4689/6885/4793/3112/7124/5579/3684/5600	24
hsa03022	hsa03022	Basal transcription factors	13/3186	45/8135	0.944189	1	0.791049	6881/2968/83860/6872/10629/2961/2969/4331/2068/2957/2963/6879/2958	13
hsa04217	hsa04217	Necroptosis	53/3186	159/8135	0.946718	1	0.791049	637/292/192111/834/8772/7188/8837/5837/7132/823/7419/5478/79643/124044/5119/29108/581/293/7099/2752/11124/8681/1540/353376/2495/2512/100137049/8605/5602/3459/7417/2747/10616/5321/5610/54822/329/11035/6773/51652/3454/815/100526767/6777/81858/114548/27243/9825/7124/27183/8717/3146/246	53
hsa00053	hsa00053	Ascorbate and aldarate metabolism	8/3186	30/8135	0.94765	1	0.791049	10327/9365/54658/7367/7364/2990/79799/54576	8
hsa05204	hsa05204	Chemical carcinogenesis - DNA adducts	21/3186	69/8135	0.948874	1	0.791049	1545/2950/4259/6799/2948/873/373156/2949/54658/9/1571/7367/4257/9446/64816/7364/1646/1562/79799/54576/4258	21
hsa05203	hsa05203	Viral carcinogenesis	69/3186	204/8135	0.952087	1	0.791049	991/9114/5902/5290/387/3135/1232/7188/2968/9734/3572/7419/1019/578/9093/1959/718/5595/898/5922/896/3516/5966/581/3105/27044/8841/890/1386/51564/1385/1108/3265/55697/1654/595/5568/1739/5423/5295/2961/3065/7531/2033/1387/7187/572/22938/5610/87/3249/3106/3134/2957/1021/6777/5934/983/6714/5315/8717/3190/1388/10971/3107/5567/2958/7337/6672	69
hsa04142	hsa04142	Lysosome	43/3186	132/8135	0.952198	1	0.791049	533/9114/22901/3423/1657/1174/23457/51172/2717/9374/162/8905/4669/10312/968/2519/2517/23431/9179/950/8692/1512/10053/411/4668/84572/2990/3482/1519/4126/57192/1211/2720/5476/5641/1212/1176/50617/10717/2581/8546/54/175	43
hsa05235	hsa05235	PD-L1 expression and PD-1 checkpoint pathway in cancer	27/3186	89/8135	0.967682	1	0.791049	6199/5290/10000/5605/6198/5595/4615/208/5603/7099/3265/7189/353376/5295/4794/3459/5588/5781/116071/7097/207/4215/4793/915/5728/5600/5530	27
hsa04612	hsa04612	Antigen processing and presentation	23/3186	78/8135	0.971503	1	0.791049	3135/4801/3312/5720/3111/10197/3105/6890/1385/6892/811/5993/5721/3306/3106/3134/4802/3112/7124/5641/4800/3107/567	23
hsa04662	hsa04662	B cell receptor signaling pathway	24/3186	82/8135	0.976656	1	0.791049	5290/10000/6654/5605/5595/6655/1380/25780/2932/208/8519/3265/5295/353514/4794/5336/975/207/4793/7410/84433/5579/930/5530	24
hsa05310	hsa05310	Asthma	7/3186	31/8135	0.984264	1	0.791049	3596/3111/6356/3567/2206/3112/7124	7
hsa05330	hsa05330	Allograft rejection	9/3186	38/8135	0.985804	1	0.791049	3135/3111/3105/3567/3106/3134/3112/7124/3107	9
hsa04630	hsa04630	JAK-STAT signaling pathway	50/3186	162/8135	0.989185	1	0.791049	3952/8651/3598/2690/3596/5290/10000/6654/3977/3589/9655/3572/2273/6655/50616/3953/3590/896/7066/208/5159/9180/3265/595/10401/1440/3567/5295/11009/1437/3459/2033/5781/3595/1387/2057/4609/6773/207/3454/3601/338376/6777/5155/1154/85480/316/3600/5617/51561	50
hsa05162	hsa05162	Measles	42/3186	139/8135	0.98928	1	0.791049	637/8772/5290/10000/3312/1019/578/3654/898/868/896/51209/2932/4615/581/208/25898/7099/595/7189/5295/5602/3306/4478/7187/572/7097/5610/4938/6773/207/3454/6885/1021/4793/6777/1965/915/9451/8717/64135/842	42
hsa04672	hsa04672	Intestinal immune network for IgA production	12/3186	49/8135	0.989904	1	0.791049	6370/3111/6387/8174/3567/2826/10673/3601/3112/23308/5284/3600	12
hsa03008	hsa03008	Ribosome biogenesis in eukaryotes	31/3186	109/8135	0.992914	1	0.791049	10199/5901/10248/55505/10607/2091/3692/10775/4809/10436/138716/51602/51367/23195/84916/29107/92856/27341/9724/51096/102157402/54913/166378/81691/9790/84128/55272/55781/6949/55651/54464	31
hsa00601	hsa00601	Glycosphingolipid biosynthesis - lacto and neolacto series	5/3186	27/8135	0.994178	1	0.791049	8707/8704/6489/10402/8706	5
hsa04380	hsa04380	Osteoclast differentiation	37/3186	128/8135	0.994325	1	0.791049	7042/8651/1535/5290/10000/4286/7046/7132/2534/5595/3554/208/5603/1385/7189/1540/5295/353514/7048/9846/5602/3459/5971/8600/4689/5336/3727/6773/207/3454/814/6885/7124/3690/5600/5530/54	37
hsa05417	hsa05417	Lipid and atherosclerosis	67/3186	215/8135	0.994436	1	0.791049	637/1535/834/5290/10000/387/3708/5451/3312/19/7132/142678/3654/5595/57534/2932/4615/29108/581/208/808/5603/7099/9475/3265/4314/7189/2920/10333/7436/7412/353376/5295/51806/10010/5452/5908/2081/4973/5602/9138/23236/3306/7187/4312/572/7097/4689/839/207/2921/815/6885/1965/114548/9451/7124/6714/1649/5331/842/7410/948/414062/5600/5530/805	67
hsa04060	hsa04060	Cytokine-cytokine receptor interaction	95/3186	295/8135	0.995102	1	0.791049	3952/7042/3598/659/2690/3596/3625/4804/1232/151449/3977/8784/8200/6370/3589/7043/3624/7046/7132/7292/3572/8764/4803/9235/3623/6387/3554/50616/10344/3953/8808/7133/3590/392255/3556/6376/6356/93/7066/944/27189/9180/658/9966/2920/1440/3567/5196/7048/84818/90/11009/269/8995/9173/94/657/1437/6367/55504/2826/3459/3595/6360/8600/4838/2057/51330/10673/2921/3454/3601/338376/7850/2833/652/3626/6358/7124/65…	95
hsa05321	hsa05321	Inflammatory bowel disease	16/3186	65/8135	0.995533	1	0.791049	7042/3596/7043/6095/3111/50616/7099/7100/3567/3459/4094/3595/7097/3112/7124/51561	16
hsa04940	hsa04940	Type I diabetes mellitus	9/3186	43/8135	0.996758	1	0.791049	3135/3111/3105/3106/3134/3112/7124/5798/3107	9
hsa04658	hsa04658	Th1 and Th2 cell differentiation	24/3186	92/8135	0.997107	1	0.791049	84441/3596/5595/3111/3516/4853/5603/9794/55534/3567/4794/5602/3459/5588/4094/4854/3595/4793/3112/6777/915/864/5600/5530	24
hsa00450	hsa00450	Selenocompound metabolism	2/3186	17/8135	0.997462	1	0.791049	4548/10587	2
hsa05332	hsa05332	Graft-versus-host disease	8/3186	42/8135	0.998548	1	0.791049	3135/3111/3105/3106/3134/3112/7124/3107	8
hsa05150	hsa05150	Staphylococcus aureus infection	23/3186	96/8135	0.999477	1	0.791049	720/1673/718/3111/1675/3075/716/727/1671/715/3880/721/54474/1828/5648/3858/3860/3112/390792/3857/3882/5340/3684	23
hsa04061	hsa04061	Viral protein interaction with cytokine and cytokine receptor	24/3186	100/8135	0.99957	1	0.791049	1232/6370/7132/3572/8764/6387/10344/7133/6376/6356/2920/5196/11009/6367/2826/6360/2921/2833/6358/7124/6846/414062/6369/6363	24
hsa04620	hsa04620	Toll-like receptor signaling pathway	25/3186	104/8135	0.999646	1	0.791049	8772/5290/10000/5605/3654/5595/4615/208/5603/7099/7189/7100/10333/353376/5295/5602/7187/7097/207/3454/54472/6885/7124/414062/5600	25
hsa04623	hsa04623	Cytosolic DNA-sensing pathway	12/3186	63/8135	0.999832	1	0.791049	834/84265/5441/5434/171568/51728/29108/9533/11035/5437/4793/661	12
hsa04650	hsa04650	Natural killer cell mediated cytotoxicity	31/3186	131/8135	0.999948	1	0.791049	637/5290/3135/6654/5605/673/2534/5595/6655/399694/369/3105/3265/135250/353091/5295/1437/3459/5781/6464/5336/3106/3454/51744/3384/7124/80329/3107/7410/5579/5530	31
hsa05320	hsa05320	Autoimmune thyroid disease	8/3186	53/8135	0.999969	1	0.791049	3135/3111/3105/3567/3106/3134/3112/3107	8
hsa05034	hsa05034	Alcoholism	48/3186	187/8135	0.999969	1	0.791049	5499/2783/4915/2775/6654/673/9734/111/5595/6655/399694/2787/369/2770/2903/2782/2790/8841/808/59345/1386/51564/1385/3265/5568/2773/84152/3065/51806/136/5501/84254/7054/6464/2785/6571/814/1644/54331/6531/4128/2792/10681/1388/2905/5567/627/805	48
hsa00970	hsa00970	Aminoacyl-tRNA biosynthesis	11/3186	66/8135	0.999981	1	0.791049	123263/25973/10667/2193/283459/5188/79587/23438/10056/51067/80222	11
hsa04659	hsa04659	Th17 cell differentiation	22/3186	108/8135	0.999992	1	0.791049	6095/7046/3572/5595/3111/3554/50616/3556/861/5603/4794/7048/5602/3459/5588/4793/3112/6777/915/5600/51561/5530	22
hsa04613	hsa04613	Neutrophil extracellular trap formation	43/3186	190/8135	1	1	0.791049	292/1535/834/5290/10000/79792/5605/9734/7419/60/718/5595/2811/293/208/71/8841/5603/7099/51564/727/3674/5295/3065/7417/23236/2244/1378/7097/4689/5336/10105/10533/207/6885/3690/6714/5331/1183/3146/5579/3684/5600	43
hsa05206	hsa05206	MicroRNAs in cancer	81/3186	310/8135	1	1	0.791049	7042/8651/6935/659/1545/7148/8434/5290/387/1943/4325/472/6654/23414/1788/1869/5605/6659/5962/578/5595/6655/11186/399694/898/2146/4855/9839/1870/23405/324/8626/7143/113130/8091/994/4853/5159/2744/648/23411/1871/3265/6093/595/7422/3678/7057/131405/7431/5295/3371/3065/599/3236/7329/2033/2064/6464/7430/4854/1387/3162/5336/4609/90427/25/10298/1946/1021/27250/5155/5728/3690/5581/6768/63923/3190/4082/42…	81
hsa05322	hsa05322	Systemic lupus erythematosus	16/3186	136/8135	1	1	0.791049	730/720/733/718/3111/6741/6628/2903/716/727/715/6632/721/87/3112/7124	16
hsa04740	hsa04740	Olfactory transduction	24/3186	440/8135	1	1	0.791049	408/3000/6546/5153/5592/5138/5136/1258/2782/808/5568/5593/2774/51806/156/409/81285/815/1262/6547/127069/26212/5567/805	24
